# Supplementary material
Source: Copernicus journal article supplement (doi:10.5194/egusphere-2026-880)
Supplement: Supplementary file 1 [file egusphere-2026-880-supplement.pdf]

## Supplement

### 1 Supplement of “Contrasting land carbon uptake responses to El 2 Niño–Southern Oscillation across North America”

3 Wu Sun<sup>1</sup>, ✉, Kelsey T. Foster<sup>1,2</sup>, Yoichi P. Shiga<sup>3</sup>, Julian Merder<sup>1</sup>, Nina A. Randazzo<sup>4,5</sup>, and  
4 Anna M. Michalak<sup>1,2</sup>

5 <sup>1</sup>Department of Global Ecology, Carnegie Institution for Science, Stanford, California, USA

6 <sup>2</sup>Department of Earth System Science, Doerr School of Sustainability, Stanford University,  
7 Stanford, California, USA

8 <sup>3</sup>Independent Researcher, San Francisco, California, USA

9 <sup>4</sup>Global Modeling and Assimilation Office, NASA Goddard Space Flight Center, Greenbelt,  
10 Maryland, USA

11 <sup>5</sup>Earth System Science Interdisciplinary Center, University of Maryland, College Park, Maryland,  
12 USA

13 ✉Email: wsun@carnegiescience.edu

## Supplement

### 14 List of Supplementary Tables

|    |     |                                                                                             |    |
|----|-----|---------------------------------------------------------------------------------------------|----|
| 15 | S1  | List of sites that provide atmospheric CO <sub>2</sub> concentration measurements . . . . . | 4  |
| 16 | S2  | Number of atmospheric CO <sub>2</sub> observations assimilated each year. . . . .           | 9  |
| 17 | S3  | Drift coefficients of explanatory variables in geostatistical inversion. . . . .            | 9  |
| 18 | S4  | Optimized sill variance for each month . . . . .                                            | 10 |
| 19 | S5  | Spatial correlation length for each month . . . . .                                         | 10 |
| 20 | S6  | Temporal correlation length for each month . . . . .                                        | 11 |
| 21 | S7  | List of terrestrial biosphere models . . . . .                                              | 12 |
| 22 | S8  | Attribution of carbon uptake anomalies in ENSO-sensitive regions . . . . .                  | 13 |
| 23 | S9  | Explanatory variables with uncertain influences on carbon uptake anomalies . . . . .        | 15 |
| 24 | S10 | Attribution of carbon uptake anomalies by seasons for selected regions . . . . .            | 18 |
| 25 | S11 | Regressions for evaluating PNA and NAO influences on carbon uptake anomalies . . . . .      | 19 |

### 26 List of Supplementary Figures

|    |     |                                                                                         |    |
|----|-----|-----------------------------------------------------------------------------------------|----|
| 27 | S1  | Sensitivity of CO <sub>2</sub> observations to surface CO <sub>2</sub> fluxes . . . . . | 20 |
| 28 | S2  | Multi-year mean monthly carbon uptake patterns over North America . . . . .             | 21 |
| 29 | S3  | Uncertainty in monthly carbon uptake estimates . . . . .                                | 22 |
| 30 | S4  | Detrended anomalies in fire emissions . . . . .                                         | 23 |
| 31 | S5  | Comparison of carbon uptake anomalies between geostatistical inversion and              |    |
| 32 |     | CarbonTracker-Lagrange . . . . .                                                        | 24 |
| 33 | S6  | ENSO indices . . . . .                                                                  | 25 |
| 34 | S7  | Carbon uptake anomalies and the PNA and NAO indices . . . . .                           | 26 |
| 35 | S8  | Time lags between carbon uptake anomalies and four ENSO indices . . . . .               | 27 |
| 36 | S9  | Correlations between carbon uptake anomalies and four ENSO indices . . . . .            | 28 |
| 37 | S10 | Masks for identifying ENSO-sensitive regions . . . . .                                  | 29 |
| 38 | S11 | Test of the number of ENSO-sensitive clusters . . . . .                                 | 30 |
| 39 | S12 | Time lags and correlations between climate anomalies and Oceanic Niño Index (ONI)       | 31 |
| 40 | S13 | Months of peak net carbon uptake . . . . .                                              | 32 |
| 41 | S14 | Histogram of correlations between carbon uptake anomalies and ONI . . . . .             | 33 |
| 42 | S15 | Distribution of grid-cell-level ENSO influences on carbon uptake anomalies . . . . .    | 34 |
| 43 | S16 | Comparison of ENSO carbon cycle impact between geostatistical inversion and             |    |
| 44 |     | individual terrestrial biosphere models . . . . .                                       | 35 |
| 45 | S17 | Uncertainty in North American land carbon uptake anomalies . . . . .                    | 36 |
| 46 | S18 | Biome areal fractions of the identified ENSO-sensitive regions . . . . .                | 37 |
| 47 | S19 | Lagged correlations between regional-mean carbon uptake anomalies and ONI . . . . .     | 38 |
| 48 | S20 | Uncertainty in carbon uptake anomalies over ENSO-sensitive regions . . . . .            | 39 |

## Supplement

|    |     |                                                                                  |    |
|----|-----|----------------------------------------------------------------------------------|----|
| 49 | S21 | Seasonal patterns of lagged carbon uptake anomaly during El Niño and La Niña .   | 40 |
| 50 | S22 | Effect sizes for concurrent differences in carbon uptake and climate anomalies   |    |
| 51 |     | between ENSO phases . . . . .                                                    | 41 |
| 52 | S23 | Attribution of carbon uptake anomalies by seasons for selected regions . . . . . | 42 |
| 53 | S24 | Effect sizes for seasonal differences in climate anomalies between ENSO phases . | 43 |
| 54 | S25 | Lagged correlations between climate anomalies and ONI based on the same time     |    |
| 55 |     | lags for carbon uptake anomalies . . . . .                                       | 44 |

Supplement

56 **Table S1.** List of sites that provide atmospheric CO<sub>2</sub> concentration measurements during 2007–  
 57 2015, compiled from the ObsPack GLOBALVIEWplus CO<sub>2</sub> v3.2 data set. See also Fig. S1 for  
 58 locations of these monitoring stations.

| Code  | Name                                                       | Latitude | Longitude | Start | End  | Height (m) | Principal Investigators                                     |
|-------|------------------------------------------------------------|----------|-----------|-------|------|------------|-------------------------------------------------------------|
| AAC   | Austin Cary<br>Memorial Forest,<br>Gainesville, FL,<br>USA | 29.7381  | −82.2188  | 2010  | 2012 | 32         |                                                             |
| ACR   | Chestnut Ridge,<br>TX, USA                                 | 35.9311  | −84.3324  | 2007  | 2011 | 61         |                                                             |
| ACV   | Canaan Valley,<br>WV, USA                                  | 39.1190  | −79.4523  | 2007  | 2011 | 7          | Natasha Miles,<br>Scott Richardson,<br>& Ken Davis<br>(PSU) |
| AME   | Mead, NE, USA                                              | 41.1649  | −96.4701  | 2007  | 2011 | 5          |                                                             |
| AOZ   | Ozark, MO, USA                                             | 38.7441  | −92.2000  | 2007  | 2011 | 30         |                                                             |
| FPK   | Fort Peck, MT,<br>USA                                      | 48.3079  | −105.1017 | 2007  | 2008 | 3          |                                                             |
| GCI02 | Grenada, MS,<br>USA                                        | 33.7525  | −89.8539  | 2015  | 2015 | 100        |                                                             |
| GCI03 | Magee, MS, USA                                             | 31.8869  | −89.7276  | 2015  | 2015 | 100        |                                                             |
| GCI04 | Millerville, AL,<br>USA                                    | 33.1759  | −85.8911  | 2015  | 2015 | 100        |                                                             |
| INX01 | INFLUX Tower 1,<br>Mooresville, IN,<br>USA                 | 39.5805  | −86.4207  | 2011  | 2012 | 121        |                                                             |
| INX09 | INFLUX Tower 9,<br>Greenfield, IN,<br>USA                  | 39.8627  | −85.7448  | 2012  | 2012 | 130        |                                                             |
| RCE   | Centerville, IA,<br>USA                                    | 40.7919  | −92.8775  | 2007  | 2009 | 110        |                                                             |
| RGV   | Galesville, WI,<br>USA                                     | 44.0910  | −91.3382  | 2007  | 2009 | 140        |                                                             |
| RKW   | Kewanee, IL, USA                                           | 41.2762  | −89.9724  | 2007  | 2009 | 140        |                                                             |

*continued on the next page*

## Supplement

| Code                                    | Name                                                        | Latitude | Longitude | Start | End  | Height (m) | Principal Investigators                                     |
|-----------------------------------------|-------------------------------------------------------------|----------|-----------|-------|------|------------|-------------------------------------------------------------|
| <i>continued from the previous page</i> |                                                             |          |           |       |      |            |                                                             |
| RMM                                     | Mead, NE, USA                                               | 41.1386  | -96.4559  | 2007  | 2009 | 120        |                                                             |
| RRL                                     | Round Lake, MN,<br>USA                                      | 43.5263  | -95.4137  | 2007  | 2009 | 110        |                                                             |
| AMT                                     | Argyle, ME, USA                                             | 45.0346  | -68.6821  | 2007  | 2015 | 107        |                                                             |
| BAO                                     | Boulder Atmo-<br>spheric Observa-<br>tory, CO, USA          | 40.0500  | -105.0040 | 2007  | 2015 | 300        | Arlyn Andrews<br>(NOAA/GML)                                 |
| LEF                                     | Park Falls, WI,<br>USA                                      | 45.9453  | -90.2744  | 2007  | 2015 | 396        |                                                             |
| WBI                                     | West Branch, IA,<br>USA                                     | 41.7248  | -91.3529  | 2007  | 2015 | 379        |                                                             |
| WKT                                     | Moody, TX, USA                                              | 31.3149  | -97.3269  | 2007  | 2015 | 457        |                                                             |
| SNP                                     | Shenandoah Na-<br>tional Park, VA,<br>USA                   | 38.6170  | -78.3500  | 2008  | 2015 | 17         | Arlyn Andrews<br>(NOAA/GML)<br>& Stephan De<br>Wekker (UVA) |
| SCT                                     | Beech Island, SC,<br>USA                                    | 33.4057  | -81.8334  | 2008  | 2015 | 305        | Arlyn Andrews<br>(NOAA/GML)<br>& Matt Parker<br>(SRNL)      |
| WGC                                     | Walnut Grove,<br>CA, USA                                    | 38.2650  | -121.4911 | 2007  | 2015 | 483        | Arlyn Andrews<br>(NOAA/GML)<br>& Marc Fischer<br>(LBNL)     |
| BRW                                     | Barrow Atmo-<br>spheric Baseline<br>Observatory, AK,<br>USA | 71.3230  | -156.6114 | 2007  | 2015 | 17         | Kirk Thoning<br>& Pieter Tans<br>(NOAA/GML)                 |
| <i>continued on the next page</i>       |                                                             |          |           |       |      |            |                                                             |

Supplement

| Code                                    | Name                           | Latitude | Longitude | Start | End  | Height (m) | Principal Investigators                                      |
|-----------------------------------------|--------------------------------|----------|-----------|-------|------|------------|--------------------------------------------------------------|
| <i>continued from the previous page</i> |                                |          |           |       |      |            |                                                              |
| MVY                                     | Marthas Vineyard,<br>MA, USA   | 41.3250  | -70.5667  | 2007  | 2015 | 10         | Colm Sweeney<br>(NOAA/GML)                                   |
| ABT                                     | Abbotsford, BC,<br>Canada      | 49.0113  | -122.3360 | 2014  | 2015 | 33         |                                                              |
| BCK                                     | Behchoko, NT,<br>Canada        | 62.7979  | -115.9180 | 2010  | 2015 | 60         |                                                              |
| BRA                                     | Bratt's Lake, SK,<br>Canada    | 50.2016  | -104.7110 | 2009  | 2015 | 35         |                                                              |
| CBY                                     | Cambridge Bay,<br>NU, Canada   | 69.1284  | -105.0580 | 2012  | 2015 | 12         |                                                              |
| CDL                                     | Candle Lake, SK,<br>Canada     | 53.9871  | -105.1179 | 2007  | 2011 | 30         | Doug Worthy<br>(Environment and<br>Climate Change<br>Canada) |
| CHL                                     | Churchill, MB,<br>Canada       | 58.7379  | -93.8206  | 2011  | 2015 | 60         |                                                              |
| CHM                                     | Chibougamau,<br>QC, Canada     | 49.6925  | -74.3423  | 2007  | 2010 | 30         |                                                              |
| CPS                                     | Chapais, QC,<br>Canada         | 49.8223  | -74.9753  | 2011  | 2015 | 8-40       |                                                              |
| EGB                                     | Egbert, ON,<br>Canada          | 44.2310  | -79.7838  | 2007  | 2015 | 3          |                                                              |
| ESP                                     | Estevan Point, BC,<br>Canada   | 49.3829  | -126.5440 | 2009  | 2015 | 40         |                                                              |
| EST                                     | Esther, AB,<br>Canada          | 51.6700  | -110.2060 | 2010  | 2015 | 3          |                                                              |
| ETL                                     | East Trout Lake,<br>SK, Canada | 54.3537  | -104.9870 | 2007  | 2015 | 105        |                                                              |
| FNE                                     | Fort Nelson, BC,<br>Canada     | 58.8412  | -122.5740 | 2014  | 2015 | 15         |                                                              |
| FSD                                     | Fraserdale, ON,<br>Canada      | 49.8752  | -81.5698  | 2007  | 2015 | 40         |                                                              |
| <i>continued on the next page</i>       |                                |          |           |       |      |            |                                                              |

Supplement

| Code                                    | Name                                   | Latitude | Longitude | Start | End  | Height (m) | Principal Investigators                       |
|-----------------------------------------|----------------------------------------|----------|-----------|-------|------|------------|-----------------------------------------------|
| <i>continued from the previous page</i> |                                        |          |           |       |      |            |                                               |
| HNP                                     | Hanlan's Point,<br>ON, Canada          | 43.6121  | -79.3862  | 2014  | 2015 | 10         |                                               |
| INU                                     | Inuvik, NT,<br>Canada                  | 68.3178  | -133.5340 | 2012  | 2015 | 10         |                                               |
| LLB                                     | Lac La Biche, AB,<br>Canada            | 54.9538  | -112.4670 | 2007  | 2015 | 10         |                                               |
| TPD                                     | Turkey Point, ON,<br>Canada            | 42.6365  | -80.5547  | 2012  | 2015 | 35         |                                               |
| WSA                                     | Sable Island, NS,<br>Canada            | 43.9323  | -60.0126  | 2007  | 2015 | 25         |                                               |
| HFM                                     | Harvard Forest,<br>MA, USA             | 42.5378  | -72.1714  | 2010  | 2015 | 29         | Steve Wofsy<br>& Bill Munger<br>(Harvard)     |
| SGP                                     | Southern Great<br>Plains, OK, USA      | 36.6070  | -97.4890  | 2007  | 2015 | 60         | Sebastien Biraud<br>& Margaret Torn<br>(LBNL) |
| HDP                                     | Hidden Peak, UT,<br>USA                | 40.5600  | -111.6500 | 2007  | 2015 | 18         | Britton Stephens<br>(NCAR)                    |
| NWR                                     | Niwot Ridge, CO,<br>USA                | 40.0531  | -105.5864 | 2007  | 2015 | 5          |                                               |
| RBA                                     | Roof Butte, AZ                         | 36.4614  | -109.0956 | 2007  | 2014 | 22         |                                               |
| SPL                                     | Storm Peak Lab-<br>oratory, CO,<br>USA | 40.4500  | -106.7300 | 2007  | 2015 | 9          |                                               |
| OFR                                     | Fir, OR, USA                           | 44.6465  | -123.5514 | 2007  | 2010 | 38         |                                               |
| OMP                                     | Mary's Peak, OR,<br>USA                | 44.5043  | -123.5530 | 2007  | 2015 | 10         | Beverly Law<br>(Oregon State U)               |
| OMT                                     | Meolius, OR, USA                       | 44.4524  | -121.5572 | 2007  | 2015 | 33         |                                               |
| ONG                                     | Burns, OR, USA                         | 43.4704  | -119.6910 | 2007  | 2015 | 6          |                                               |
| <i>continued on the next page</i>       |                                        |          |           |       |      |            |                                               |

Supplement

| Code                                    | Name                                                                       | Latitude | Longitude | Start | End  | Height (m) | Principal Investigators                                                              |
|-----------------------------------------|----------------------------------------------------------------------------|----------|-----------|-------|------|------------|--------------------------------------------------------------------------------------|
| <i>continued from the previous page</i> |                                                                            |          |           |       |      |            |                                                                                      |
| OSI                                     | Silverton, OR,<br>USA                                                      | 44.9986  | -122.6950 | 2012  | 2015 | 269        |                                                                                      |
| OWA                                     | Walton, OR, USA                                                            | 44.0664  | -123.6290 | 2012  | 2015 | 72         |                                                                                      |
| OYQ                                     | Yaquina Head,<br>OR, USA                                                   | 44.6750  | -124.0670 | 2007  | 2011 | 12         |                                                                                      |
| KCMP                                    | Rosemount<br>Research and<br>Outreach Center,<br>MN, USA                   | 44.6886  | -93.0728  | 2007  | 2008 | 200        | Tim Griffis (UMN)                                                                    |
| CRV                                     | Carbon in Arc-<br>tic Reservoirs<br>Vulnerability<br>Experiment<br>(CARVE) | 64.9863  | -147.5980 | 2011  | 2015 | 32         | Colm Sweeney,<br>Arlyn Andrews,<br>John B. Miller, &<br>Kathryn McKain<br>(NOAA/GML) |
| MBO                                     | Mt. Bachelor<br>Observatory, OR,<br>USA                                    | 43.9775  | -121.6861 | 2012  | 2015 | 11         | Dan Jaffe (UW) &<br>Arlyn Andrews<br>(NOAA/GML)                                      |

59

**Table S2.** Number of atmospheric CO<sub>2</sub> observations assimilated each year.

| Year  | Number of observations |
|-------|------------------------|
| 2007  | 8851                   |
| 2008  | 9923                   |
| 2009  | 9956                   |
| 2010  | 10,587                 |
| 2011  | 10,204                 |
| 2012  | 11,451                 |
| 2013  | 11,282                 |
| 2014  | 11,728                 |
| 2015  | 12,381                 |
| Total | 96,363                 |

60 **Table S3.** Drift coefficients of explanatory variables used in geostatistical inverse estimation of  
61 carbon fluxes: solar-induced fluorescence (SIF), specific humidity ( $q$ ), and precipitation. Also  
62 shown are standard errors (SE) of estimated drift coefficients. Units of drift coefficients are:  $\hat{\beta}_{\text{SIF}}$ ,  
63  $\mu\text{mol s}^{-1} \text{mW}^{-1} \text{sr nm}$ ;  $\hat{\beta}_q$ ,  $\mu\text{mol m}^{-2} \text{s}^{-1} \text{kg}^{-1} \text{H}_2\text{O kg air}$ ,  $\hat{\beta}_{\text{precip}}$ ,  $\mu\text{mol kg}^{-1}$ .

|      | $\hat{\beta}_{\text{SIF}}$ | $\text{SE}(\hat{\beta}_{\text{SIF}})$ | $\hat{\beta}_q$ | $\text{SE}(\hat{\beta}_q)$ | $\hat{\beta}_{\text{precip}}$ | $\text{SE}(\hat{\beta}_{\text{precip}})$ |
|------|----------------------------|---------------------------------------|-----------------|----------------------------|-------------------------------|------------------------------------------|
| 2007 | -1.329                     | 0.127                                 | 109.8           | 16.5                       | 4037.4                        | 1306.9                                   |
| 2008 | -1.339                     | 0.124                                 | 164.9           | 17.0                       | 1658.7                        | 1182.7                                   |
| 2009 | -1.876                     | 0.116                                 | 177.6           | 15.5                       | -339.8                        | 1047.1                                   |
| 2010 | -1.185                     | 0.119                                 | 97.0            | 16.3                       | -2259.7                       | 873.8                                    |
| 2011 | -1.385                     | 0.127                                 | 134.0           | 15.9                       | 868.0                         | 934.8                                    |
| 2012 | -1.347                     | 0.115                                 | 100.5           | 14.4                       | 589.6                         | 975.7                                    |
| 2013 | -1.015                     | 0.110                                 | 71.0            | 13.8                       | 349.2                         | 1014.2                                   |
| 2014 | -1.698                     | 0.142                                 | 105.4           | 13.8                       | -327.2                        | 870.2                                    |
| 2015 | -1.219                     | 0.126                                 | 98.7            | 12.4                       | 977.6                         | 823.8                                    |

Supplement

64 **Table S4.** Optimized sill variance ( $\sigma_Q^2$ , [ $\mu\text{mol m}^{-2} \text{s}^{-1}$ ] $^2$ ) for each month. The 2007–2015 mean  
 65 values for each month are used for inverse estimation of CO<sub>2</sub> fluxes.

|           | 2007 | 2008 | 2009 | 2010 | 2011 | 2012 | 2013 | 2014 | 2015 | Mean |
|-----------|------|------|------|------|------|------|------|------|------|------|
| January   | 2.1  | 20.7 | 2.5  | 2.2  | 5.0  | 4.2  | 3.2  | 2.1  | 1.0  | 4.8  |
| February  | 2.7  | 6.0  | 1.7  | 2.0  | 5.2  | 1.5  | 1.2  | 1.9  | 2.1  | 2.7  |
| March     | 10.7 | 12.9 | 6.6  | 4.1  | 3.7  | 2.6  | 2.3  | 4.1  | 2.7  | 5.5  |
| April     | 6.2  | 9.0  | 6.5  | 14.8 | 6.1  | 3.6  | 4.7  | 4.1  | 3.4  | 6.5  |
| May       | 17.7 | 17.5 | 18.5 | 18.0 | 4.6  | 2.4  | 6.0  | 19.9 | 11.9 | 12.9 |
| June      | 38.8 | 40.8 | 40.7 | 22.4 | 16.6 | 23.8 | 39.0 | 22.5 | 38.1 | 31.4 |
| July      | 89.3 | 72.8 | 93.8 | 44.0 | 40.5 | 27.7 | 61.4 | 53.8 | 58.0 | 60.1 |
| August    | 69.2 | 53.5 | 70.4 | 18.5 | 38.5 | 15.5 | 30.8 | 21.5 | 42.4 | 40.0 |
| September | 29.8 | 17.9 | 26.5 | 8.6  | 8.8  | 8.9  | 20.5 | 14.5 | 13.8 | 16.6 |
| October   | 11.8 | 27.4 | 8.9  | 5.3  | 3.5  | 5.0  | 4.0  | 5.2  | 7.1  | 8.7  |
| November  | 5.4  | 7.7  | 6.9  | 5.9  | 2.2  | 3.7  | 3.3  | 2.7  | 5.1  | 4.8  |
| December  | 4.1  | 8.1  | 2.7  | 2.8  | 2.2  | 1.8  | 3.1  | 1.3  | 1.9  | 3.1  |

66 **Table S5.** Spatial correlation length ( $\ell$ , km) for each month. The 2007–2015 mean values for each  
 67 month are used for the inverse estimates of CO<sub>2</sub> fluxes.

|           | 2007 | 2008 | 2009 | 2010 | 2011 | 2012 | 2013 | 2014 | 2015 | Mean |
|-----------|------|------|------|------|------|------|------|------|------|------|
| January   | 1006 | 6983 | 466  | 775  | 4217 | 4012 | 1024 | 591  | 1151 | 2247 |
| February  | 9530 | 1375 | 507  | 1498 | 1622 | 5993 | 279  | 1234 | 1352 | 2599 |
| March     | 941  | 9988 | 477  | 302  | 1362 | 1196 | 831  | 1770 | 1318 | 2021 |
| April     | 1049 | 1012 | 639  | 2073 | 842  | 2393 | 1303 | 979  | 610  | 1211 |
| May       | 784  | 1282 | 641  | 2232 | 1901 | 746  | 793  | 1152 | 284  | 1091 |
| June      | 1162 | 1378 | 1308 | 1627 | 2648 | 1797 | 181  | 220  | 470  | 1199 |
| July      | 624  | 1816 | 2450 | 781  | 1480 | 1880 | 455  | 250  | 151  | 1099 |
| August    | 613  | 673  | 1135 | 969  | 1438 | 559  | 891  | 560  | 783  | 847  |
| September | 926  | 1412 | 1475 | 2082 | 992  | 1454 | 530  | 720  | 655  | 1138 |
| October   | 828  | 3866 | 542  | 2465 | 1119 | 2198 | 504  | 1069 | 1001 | 1510 |
| November  | 1424 | 799  | 3561 | 4386 | 936  | 1632 | 1100 | 944  | 1419 | 1800 |
| December  | 391  | 438  | 401  | 812  | 863  | 1344 | 439  | 212  | 2050 | 772  |

Supplement

68 **Table S6.** Temporal correlation length ( $\tau$ , d) for each month. The 2007–2015 mean values for each  
 69 month are used for the inverse estimates of CO<sub>2</sub> fluxes.

|           | 2007 | 2008 | 2009 | 2010 | 2011 | 2012 | 2013 | 2014 | 2015 | Mean |
|-----------|------|------|------|------|------|------|------|------|------|------|
| January   | 10   | 44   | 15   | 31   | 78   | 23   | 51   | 16   | 60   | 37   |
| February  | 57   | 28   | 20   | 42   | 24   | 77   | 60   | 60   | 60   | 48   |
| March     | 79   | 89   | 10   | 15   | 13   | 21   | 31   | 60   | 49   | 41   |
| April     | 73   | 11   | 30   | 70   | 28   | 100  | 28   | 47   | 20   | 45   |
| May       | 20   | 46   | 6    | 100  | 17   | 100  | 60   | 60   | 32   | 49   |
| June      | 56   | 53   | 30   | 23   | 100  | 100  | 20   | 30   | 43   | 51   |
| July      | 23   | 60   | 50   | 18   | 89   | 100  | 12   | 45   | 45   | 49   |
| August    | 43   | 48   | 19   | 19   | 97   | 25   | 28   | 25   | 17   | 35   |
| September | 28   | 5    | 6    | 47   | 8    | 19   | 8    | 22   | 11   | 17   |
| October   | 14   | 18   | 10   | 61   | 57   | 57   | 4    | 60   | 7    | 32   |
| November  | 15   | 18   | 100  | 68   | 96   | 99   | 60   | 33   | 41   | 59   |
| December  | 8    | 9    | 3    | 25   | 45   | 33   | 60   | 60   | 60   | 34   |

70 **Table S7.** List of terrestrial biosphere models from the TRENDY v11 ensemble (Friedlingstein et al.,  
 71 2022) used in this study.

| Model      | Full name                                                                                                                              | References               |
|------------|----------------------------------------------------------------------------------------------------------------------------------------|--------------------------|
| CABLE-POP  | Community Atmosphere–Biosphere Land Exchange model + Populations–Order–Physiology model                                                | Haverd et al. (2018)     |
| CLASSIC    | Canadian Land Surface Scheme Including Biogeochemical Cycles                                                                           | Melton et al. (2020)     |
| CLM5.0     | Community Land Model Version 5                                                                                                         | Lawrence et al. (2019)   |
| IBIS       | Integrated Biosphere Simulator                                                                                                         | Yuan et al. (2014)       |
| ISAM       | Integrated Science Assessment Model                                                                                                    | Meiyappan et al. (2015)  |
| ISBA-CTrip | Interaction Soil-Biosphere-Atmosphere (ISBA) & Centre National de Recherches Météorologiques Total Runoff Integrating Pathways (CTrip) | Delire et al. (2020)     |
| JSBACH     | Jena Scheme for Biosphere-Atmosphere Coupling in Hamburg                                                                               | Reick et al. (2021)      |
| JULES      | Joint UK Land Environment Simulator                                                                                                    | Wiltshire et al. (2021)  |
| LPJ        | Lund–Potsdam–Jena Model                                                                                                                | Poulter et al. (2011)    |
| LPX-Bern   | Land Surface Processes and Exchanges Model                                                                                             | Lienert and Joos (2018)  |
| OCN        | Organising Carbon and Hydrology in Dynamic Ecosystems (with Carbon–Nitrogen Coupling)                                                  | Zaehle and Friend (2010) |
| ORCHIDEEv3 | Organising Carbon and Hydrology in Dynamic Ecosystems (Version 3; Revision 7267)                                                       | Vuichard et al. (2019)   |
| SDGVM      | Sheffield Dynamic Global Vegetation Model                                                                                              | Walker et al. (2017)     |
| VISIT      | Vegetation Integrative Simulator for Trace Gases                                                                                       | Kato et al. (2013)       |
| VISIT-NIES | Vegetation Integrative Simulator for Trace Gases (National Institute for Environmental Studies, Japan)                                 | Ito (2019)               |
| YIBs       | The Yale Interactive terrestrial Biosphere model                                                                                       | Yue and Unger (2015)     |

Supplement

72 **Table S8.** Attribution of carbon uptake anomalies to concurrent or lag-1 climate anomalies in  
 73 ENSO-sensitive regions. We use the Schwarz Bayesian information criterion (SBC) to select  
 74 climate anomalies that best explain carbon uptake anomalies among anomalies in temperature  
 75 ( $\Delta T$ ), solar radiation ( $\Delta R_{sw}$ ), precipitation ( $\Delta P$ ), soil moisture ( $\Delta SWC$ ), and vapor pressure deficit  
 76 ( $\Delta VPD$ ). Carbon uptake anomalies in the prior month ( $\Delta NBP_{-1}$ ) are also selected to account  
 77 for autocorrelation. Influences of climate anomalies are indicated by standardized coefficients.  
 78 Collinearity is assessed using the variance inflation factor (VIF).

| Region                      | Metrics | Intercept | $\Delta NBP_{-1}$ | $\Delta T$ | $\Delta R_{sw}$ | $\Delta P$ | $\Delta SWC$ | $\Delta VPD$ |
|-----------------------------|---------|-----------|-------------------|------------|-----------------|------------|--------------|--------------|
| Southern<br>Great Plains    | lag     | -         | 1                 | 0          | -               | 1          | 0            | 1            |
|                             | coef.   | -0.020    | 0.379             | -0.054     | -               | 0.241      | -0.032       | -0.123       |
|                             | s.e.    | 0.008     | 0.009             | 0.009      | -               | 0.011      | 0.010        | 0.011        |
|                             | VIF     | -         | 1.098             | 1.181      | -               | 1.776      | 1.609        | 1.820        |
|                             | SBC     | 22935.97  |                   |            |                 |            |              |              |
|                             | $r$     | 0.549     |                   |            |                 |            |              |              |
| Pacific-Mountainous<br>West | lag     | -         | 1                 | 1          | 0               | 0          | -            | 0            |
|                             | coef.   | -0.025    | 0.310             | 0.158      | 0.091           | -0.099     | -            | -0.067       |
|                             | s.e.    | 0.010     | 0.010             | 0.011      | 0.013           | 0.013      | -            | 0.013        |
|                             | VIF     | -         | 1.050             | 1.209      | 1.690           | 1.501      | -            | 1.486        |
|                             | SBC     | 17900.52  |                   |            |                 |            |              |              |
|                             | $r$     | 0.424     |                   |            |                 |            |              |              |
| Central<br>Gulf Coast       | lag     | -         | 1                 | 1          | 0               | 0          | 0            | 0            |
|                             | coef.   | -0.003    | 0.390             | 0.212      | 0.258           | -0.230     | 0.148        | -0.361       |
|                             | s.e.    | 0.010     | 0.011             | 0.012      | 0.013           | 0.013      | 0.013        | 0.015        |
|                             | VIF     | -         | 1.071             | 1.182      | 1.457           | 1.452      | 1.578        | 1.918        |
|                             | SBC     | 13135.04  |                   |            |                 |            |              |              |
|                             | $r$     | 0.633     |                   |            |                 |            |              |              |

*continued on the next page*

Supplement

| Region                                  | Metrics  | Intercept | $\Delta\text{NBP}_{-1}$ | $\Delta T$ | $\Delta R_{\text{sw}}$ | $\Delta P$ | $\Delta\text{SWC}$ | $\Delta\text{VPD}$ |
|-----------------------------------------|----------|-----------|-------------------------|------------|------------------------|------------|--------------------|--------------------|
| <i>continued from the previous page</i> |          |           |                         |            |                        |            |                    |                    |
| Upper<br>Midwest                        | lag      | -         | 1                       | -          | 0                      | 0          | -                  | 0                  |
|                                         | coef.    | -0.005    | 0.397                   | -          | 0.047                  | -0.151     | -                  | 0.154              |
|                                         | s.e.     | 0.009     | 0.013                   | -          | 0.012                  | 0.013      | -                  | 0.019              |
|                                         | VIF      | -         | 1.059                   | -          | 1.159                  | 1.412      | -                  | 1.352              |
|                                         | SBC      | 9405.35   |                         |            |                        |            |                    |                    |
|                                         | <i>r</i> | 0.343     |                         |            |                        |            |                    |                    |
| Northern<br>Rockies                     | lag      | -         | 1                       | 0          | 0                      | 0          | -                  | 0                  |
|                                         | coef.    | 0.004     | 0.295                   | 0.062      | 0.114                  | -0.114     | -                  | -0.280             |
|                                         | s.e.     | 0.009     | 0.011                   | 0.011      | 0.014                  | 0.012      | -                  | 0.015              |
|                                         | VIF      | -         | 1.040                   | 1.487      | 1.849                  | 1.633      | -                  | 2.038              |
|                                         | SBC      | 17706.19  |                         |            |                        |            |                    |                    |
|                                         | <i>r</i> | 0.392     |                         |            |                        |            |                    |                    |
| Southern<br>Appalachia                  | lag      | -         | 1                       | -          | -                      | 0          | 0                  | -                  |
|                                         | coef.    | -0.001    | 0.273                   | -          | -                      | -0.169     | 0.217              | -                  |
|                                         | s.e.     | 0.016     | 0.020                   | -          | -                      | 0.017      | 0.018              | -                  |
|                                         | VIF      | -         | 1.096                   | -          | -                      | 1.115      | 1.139              | -                  |
|                                         | SBC      | 5447.00   |                         |            |                        |            |                    |                    |
|                                         | <i>r</i> | 0.525     |                         |            |                        |            |                    |                    |

Supplement

79 **Table S9.** Explanatory variables with uncertain influences on carbon uptake anomalies: soil  
 80 moisture anomalies ( $\Delta\text{SWC}$ ) for the southern Great Plains, vapor pressure deficit anomalies  
 81 ( $\Delta\text{VPD}$ ) for the Pacific–Mountainous West, shortwave radiation anomalies ( $\Delta R_{\text{sw}}$ ) for upper  
 82 Midwest, and temperature anomalies ( $\Delta T$ ) for northern Rockies. For each region, we identify  
 83 explanatory variables with uncertain influences (orange columns) by examining standardized  
 84 coefficients from models that use only a subset of explanatory variables from the selected model  
 85 (green rows; same models as in Table S8). An explanatory variable has an uncertain influence  
 86 on carbon uptake anomalies, if its standardized coefficients change sign among these submodels  
 87 tested. These variables are labeled as empty symbols in Fig. 4a in the main text.

| Region                | ID | Coefficients            |            |                 |                    |                         | SBC    |
|-----------------------|----|-------------------------|------------|-----------------|--------------------|-------------------------|--------|
|                       |    | $\Delta\text{NBP}_{-1}$ | $\Delta T$ | $\Delta P_{-1}$ | $\Delta\text{SWC}$ | $\Delta\text{VPD}_{-1}$ |        |
| Southern Great Plains | 32 | 0.379                   | -0.054     | 0.241           | -0.032             | -0.123                  | 22,936 |
|                       | 24 | 0.383                   | -          | 0.243           | -0.020             | -0.133                  | 22,966 |
|                       | 16 | 0.404                   | -0.067     | 0.294           | -0.006             | -                       | 23,042 |
|                       | 8  | 0.411                   | -          | 0.302           | 0.012              | -                       | 23,092 |
|                       | 30 | 0.344                   | -0.057     | -               | 0.049              | -0.229                  | 23,385 |
|                       | 22 | 0.348                   | -          | -               | 0.063              | -0.240                  | 23,417 |
|                       | 14 | 0.388                   | -0.084     | -               | 0.150              | -                       | 23,833 |
|                       | 6  | 0.396                   | -          | -               | 0.179              | -                       | 23,909 |
|                       | 31 | -                       | -0.070     | 0.153           | -0.002             | -0.239                  | 24,484 |
|                       | 23 | -                       | -          | 0.156           | 0.013              | -0.253                  | 24,532 |
|                       | 29 | -                       | -0.072     | -               | 0.046              | -0.300                  | 24,636 |
|                       | 21 | -                       | -          | -               | 0.064              | -0.315                  | 24,687 |
|                       | 15 | -                       | -0.096     | 0.261           | 0.060              | -                       | 24,901 |
|                       | 7  | -                       | -          | 0.272           | 0.087              | -                       | 24,995 |
|                       | 13 | -                       | -0.113     | -               | 0.193              | -                       | 25,407 |
|                       | 5  | -                       | -          | -               | 0.232              | -                       | 25,530 |

*continued on the next page*

Supplement

| Region | ID | Coefficients |  |  |  |  | SBC |
|--------|----|--------------|--|--|--|--|-----|
|--------|----|--------------|--|--|--|--|-----|

*continued from the previous page*

|                          |    | $\Delta NBP_{-1}$ | $\Delta T_{-1}$ | $\Delta R_{sw}$ | $\Delta P$ | $\Delta VPD$ |        |
|--------------------------|----|-------------------|-----------------|-----------------|------------|--------------|--------|
| Pacific-Mountainous West | 32 | 0.310             | 0.158           | 0.091           | -0.099     | -0.067       | 17,901 |
|                          | 28 | 0.307             | 0.162           | -               | -0.144     | -0.039       | 17,939 |
|                          | 30 | 0.312             | 0.148           | 0.147           | -          | -0.060       | 17,955 |
|                          | 24 | 0.313             | -               | 0.103           | -0.078     | 0.002        | 18,105 |
|                          | 26 | 0.308             | 0.149           | -               | -          | 0.009        | 18,113 |
|                          | 22 | 0.315             | -               | 0.147           | -          | 0.004        | 18,135 |
|                          | 20 | 0.310             | -               | -               | -0.129     | 0.035        | 18,156 |
|                          | 18 | 0.312             | -               | -               | -          | 0.073        | 18,294 |
|                          | 31 | -                 | 0.173           | 0.079           | -0.110     | -0.009       | 18,746 |
|                          | 27 | -                 | 0.177           | -               | -0.149     | 0.015        | 18,769 |
|                          | 29 | -                 | 0.163           | 0.141           | -          | -0.002       | 18,807 |
|                          | 25 | -                 | 0.164           | -               | -          | 0.064        | 18,937 |
|                          | 23 | -                 | -               | 0.093           | -0.088     | 0.064        | 18,962 |
|                          | 19 | -                 | -               | -               | -0.134     | 0.094        | 18,997 |
|                          | 21 | -                 | -               | 0.143           | -          | 0.066        | 18,999 |
| 17                       | -  | -                 | -               | -               | 0.133      | 19,132       |        |

|               |    | $\Delta NBP_{-1}$ | $\Delta R_{sw}$ | $\Delta P$ | $\Delta VPD$ |        |
|---------------|----|-------------------|-----------------|------------|--------------|--------|
| Upper Midwest | 16 | 0.397             | 0.047           | -0.151     | 0.154        | 9405   |
|               | 8  | 0.405             | 0.039           | -0.206     | -            | 9460   |
|               | 14 | 0.399             | 0.087           | -          | 0.242        | 9530   |
|               | 6  | 0.433             | 0.101           | -          | -            | 9715   |
|               | 15 | -                 | -0.019          | -0.200     | 0.186        | 10,188 |
|               | 7  | -                 | -0.027          | -0.268     | -            | 10,243 |
|               | 13 | -                 | 0.029           | -          | 0.332        | 10,349 |
|               | 5  | -                 | 0.058           | -          | -            | 10,601 |

*continued on the next page*

Supplement

| Region                                  | ID | Coefficients            |            |                        |            |                    | SBC    |
|-----------------------------------------|----|-------------------------|------------|------------------------|------------|--------------------|--------|
| <i>continued from the previous page</i> |    |                         |            |                        |            |                    |        |
|                                         |    | $\Delta\text{NBP}_{-1}$ | $\Delta T$ | $\Delta R_{\text{sw}}$ | $\Delta P$ | $\Delta\text{VPD}$ |        |
| Northern Rockies                        | 32 | 0.295                   | 0.062      | 0.114                  | -0.114     | -0.280             | 17,706 |
|                                         | 28 | 0.301                   | 0.053      | -                      | -0.163     | -0.235             | 17,766 |
|                                         | 30 | 0.286                   | 0.069      | 0.174                  | -          | -0.260             | 17,783 |
|                                         | 26 | 0.291                   | 0.056      | -                      | -          | -0.149             | 17,975 |
|                                         | 12 | 0.278                   | -0.033     | -                      | -0.095     | -                  | 18,006 |
|                                         | 16 | 0.275                   | -0.035     | 0.026                  | -0.081     | -                  | 18,010 |
|                                         | 14 | 0.270                   | -0.025     | 0.070                  | -          | -                  | 18,044 |
|                                         | 10 | 0.277                   | -0.010     | -                      | -          | -                  | 18,082 |
|                                         | 31 | -                       | 0.060      | 0.131                  | -0.088     | -0.218             | 18,378 |
|                                         | 29 | -                       | 0.067      | 0.178                  | -          | -0.206             | 18,417 |
|                                         | 27 | -                       | 0.047      | -                      | -0.143     | -0.160             | 18,453 |
|                                         | 15 | -                       | -0.019     | 0.054                  | -0.068     | -                  | 18,545 |
|                                         | 11 | -                       | -0.014     | -                      | -0.098     | -                  | 18,555 |
|                                         | 13 | -                       | -0.010     | 0.092                  | -          | -                  | 18,565 |
|                                         | 25 | -                       | 0.049      | -                      | -          | -0.086             | 18,604 |
|                                         | 9  | -                       | 0.009      | -                      | -          | -                  | 18,633 |

Supplement

88 **Table S10.** Attribution of carbon uptake anomalies in early (December–May) and late seasons  
 89 (June–November) for selected ENSO-sensitive regions. Also shown are coefficients from a test for  
 90 upper Midwest without using the data from 2012, an exceptional drought year.

| Region              | Period          | Metrics         | Intercept | $\Delta\text{NBP}_{-1}$ | $\Delta T$ | $\Delta R_{\text{sw}}$ | $\Delta P$ | $\Delta\text{SWC}$ | $\Delta\text{VPD}$ |   |  |
|---------------------|-----------------|-----------------|-----------|-------------------------|------------|------------------------|------------|--------------------|--------------------|---|--|
| Upper Midwest       | Without 2012    | lag             | -         | 1                       | -          | -                      | 0          | -                  | 0                  |   |  |
|                     |                 | coef.           | -0.047    | 0.341                   | -          | -                      | -0.174     | -                  | 0.141              |   |  |
|                     |                 | s.e.            | 0.010     | 0.014                   | -          | -                      | 0.014      | -                  | 0.016              |   |  |
|                     |                 | SBC             |           |                         |            |                        | 8200.44    |                    |                    |   |  |
|                     |                 | <i>r</i>        |           |                         |            |                        | 0.399      |                    |                    |   |  |
|                     |                 | Winter & Spring | lag       | -                       | 1          | -                      | 0          | 0                  | -                  | 0 |  |
|                     | coef.           | -0.009          | 0.183     | -                       | 0.036      | -0.074                 | -          | 0.182              |                    |   |  |
|                     | s.e.            | 0.010           | 0.012     | -                       | 0.011      | 0.013                  | -          | 0.012              |                    |   |  |
|                     | SBC             |                 |           |                         |            | 2514.35                |            |                    |                    |   |  |
|                     | <i>r</i>        |                 |           |                         |            | 0.615                  |            |                    |                    |   |  |
|                     | Summer & Fall   | lag             | -         | 1                       | 0          | -                      | 0          | 0                  | 1                  |   |  |
|                     | coef.           | -0.015          | 0.469     | -0.175                  | -          | -0.449                 | -0.100     | -0.295             |                    |   |  |
| s.e.                | 0.022           | 0.025           | 0.027     | -                       | 0.029      | 0.027                  | 0.045      |                    |                    |   |  |
| SBC                 |                 |                 |           |                         | 6153.40    |                        |            |                    |                    |   |  |
| <i>r</i>            |                 |                 |           |                         | 0.535      |                        |            |                    |                    |   |  |
| Northern Rockies    | Winter & Spring | lag             | -         | 1                       | 0          | -                      | 0          | 0                  | 1                  |   |  |
|                     |                 | coef.           | 0.011     | 0.184                   | 0.039      | -                      | -0.064     | 0.072              | 0.148              |   |  |
|                     |                 | s.e.            | 0.010     | 0.010                   | 0.010      | -                      | 0.010      | 0.011              | 0.011              |   |  |
|                     | SBC             |                 |           |                         |            | 6043.65                |            |                    |                    |   |  |
|                     | <i>r</i>        |                 |           |                         |            | 0.409                  |            |                    |                    |   |  |
|                     | Summer & Fall   | lag             | -         | 1                       | -          | 0                      | 0          | -                  | 0                  |   |  |
| coef.               | 0.003           | 0.403           | -         | 0.322                   | -0.175     | -                      | -0.541     |                    |                    |   |  |
| s.e.                | 0.016           | 0.018           | -         | 0.028                   | 0.024      | -                      | 0.023      |                    |                    |   |  |
| SBC                 |                 |                 |           |                         | 10573.28   |                        |            |                    |                    |   |  |
| <i>r</i>            |                 |                 |           |                         | 0.444      |                        |            |                    |                    |   |  |
| Southern Appalachia | Winter & Spring | lag             | -         | 1                       | -          | 2                      | 0          | 0                  | 0                  |   |  |
|                     |                 | coef.           | -0.040    | 0.238                   | -          | -0.119                 | -0.123     | 0.220              | 0.094              |   |  |
|                     |                 | s.e.            | 0.016     | 0.019                   | -          | 0.018                  | 0.018      | 0.019              | 0.020              |   |  |
|                     | SBC             |                 |           |                         |            | 1897.18                |            |                    |                    |   |  |
|                     | <i>r</i>        |                 |           |                         |            | 0.618                  |            |                    |                    |   |  |
|                     | Summer & Fall   | lag             | -         | 1                       | 0          | 0                      | 1          | -                  | -                  |   |  |
| coef.               | 0.034           | 0.420           | -0.273    | 0.116                   | 0.236      | -                      | -          |                    |                    |   |  |
| s.e.                | 0.029           | 0.039           | 0.031     | 0.029                   | 0.030      | -                      | -          |                    |                    |   |  |
| SBC                 |                 |                 |           |                         | 3210.85    |                        |            |                    |                    |   |  |
| <i>r</i>            |                 |                 |           |                         | 0.573      |                        |            |                    |                    |   |  |

Supplement

91 **Table S11.** Summary of regressions for evaluating PNA and NAO influences on net carbon uptake  
 92 anomalies integrated over North America ( $\Delta\text{NBP}$ ). All regressions have a constant term (i.e.,  
 93 intercept). The inclusion of the PNA or NAO index in the regression actually degrades model  
 94 performance according to the Schwarz Bayesian information criterion (SBC).

|                            | $\Delta\text{NBP} \sim \text{ONI}$ | $\Delta\text{NBP} \sim \text{ONI} + \text{PNA}$ | $\Delta\text{NBP} \sim \text{ONI} + \text{NAO}$ |
|----------------------------|------------------------------------|-------------------------------------------------|-------------------------------------------------|
| $R^2$                      | 0.045                              | 0.065                                           | 0.049                                           |
| Adj. $R^2$                 | 0.036                              | 0.047                                           | 0.031                                           |
| SBC                        | 1264.3                             | 1266.6                                          | 1268.5                                          |
| D.f. model <sup>1</sup>    | 1                                  | 2                                               | 2                                               |
| $\hat{\beta}_{\text{ONI}}$ | 18.846                             | 17.702                                          | 18.688                                          |
| $p_{\text{ONI}}$           | 0.028                              | 0.039                                           | 0.030                                           |
| $\hat{\beta}_{\text{PNA}}$ | n/a                                | 12.955                                          | n/a                                             |
| $p_{\text{PNA}}$           | n/a                                | 0.133                                           | n/a                                             |
| $\hat{\beta}_{\text{NAO}}$ | n/a                                | n/a                                             | -4.547                                          |
| $p_{\text{NAO}}$           | n/a                                | n/a                                             | 0.507                                           |

<sup>1</sup>Degree of freedom of the model.

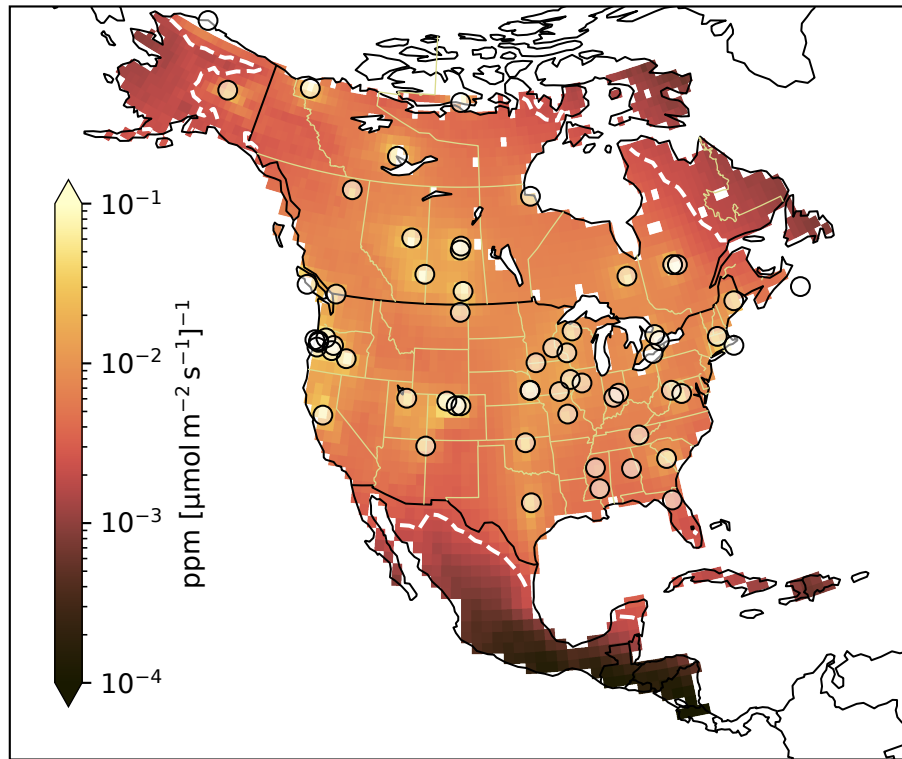

95

96 **Fig. S1.** Mean sensitivity of atmospheric CO<sub>2</sub> concentration observations to surface net CO<sub>2</sub>  
97 fluxes (ppm [μmol m<sup>-2</sup> s<sup>-1</sup>]<sup>-1</sup>) over North America, averaged over 2007–2015. Translucent circles  
98 indicate continuous CO<sub>2</sub> monitoring sites (Table S1). Grid cells enclosed within the dashed white  
99 contours are those for which the sensitivity of CO<sub>2</sub> observations to surface fluxes is among the  
100 top 80 % over North America.

Supplement

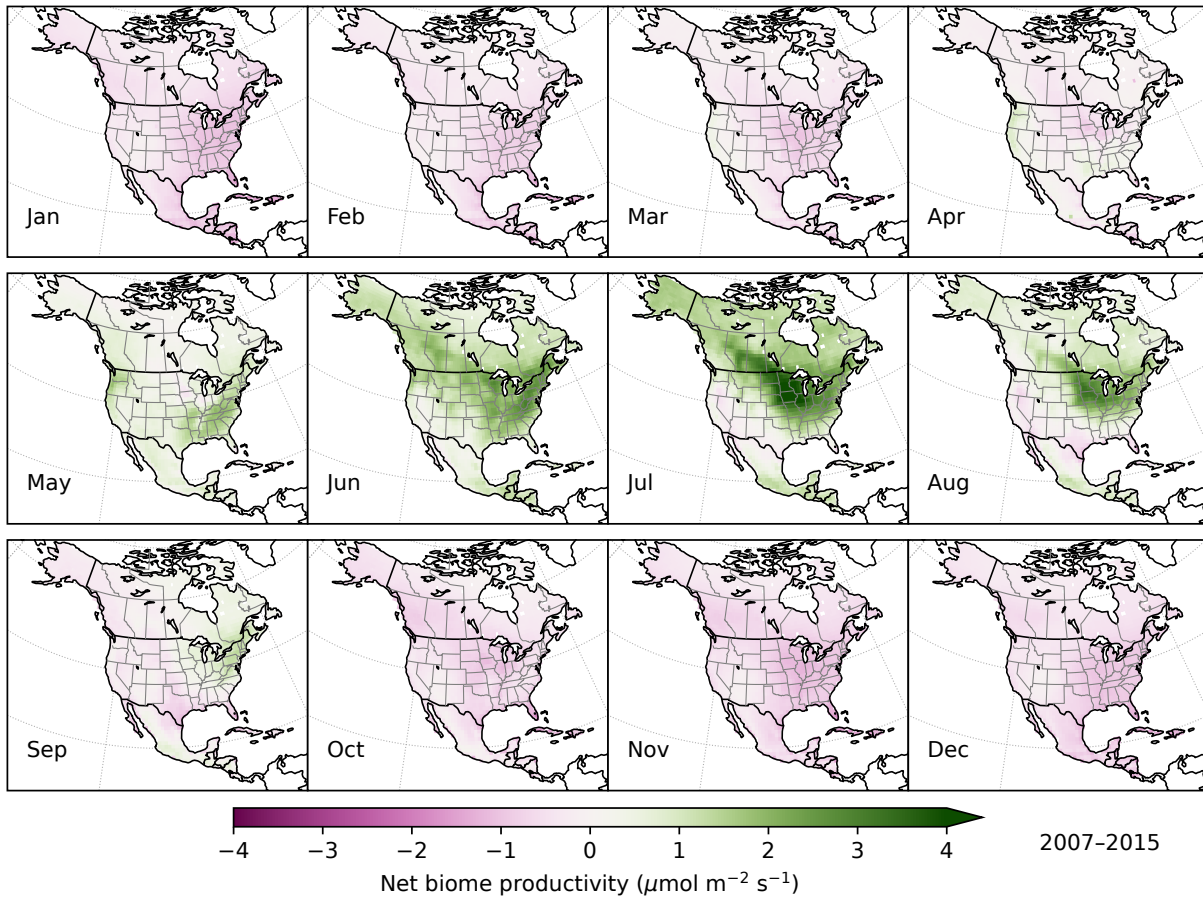

102

103 **Fig. S2.** Multi-year (2007–2015) mean monthly patterns of geostatistical inverse estimates of net  
105 biome productivity (NBP) over North America.

## Supplement

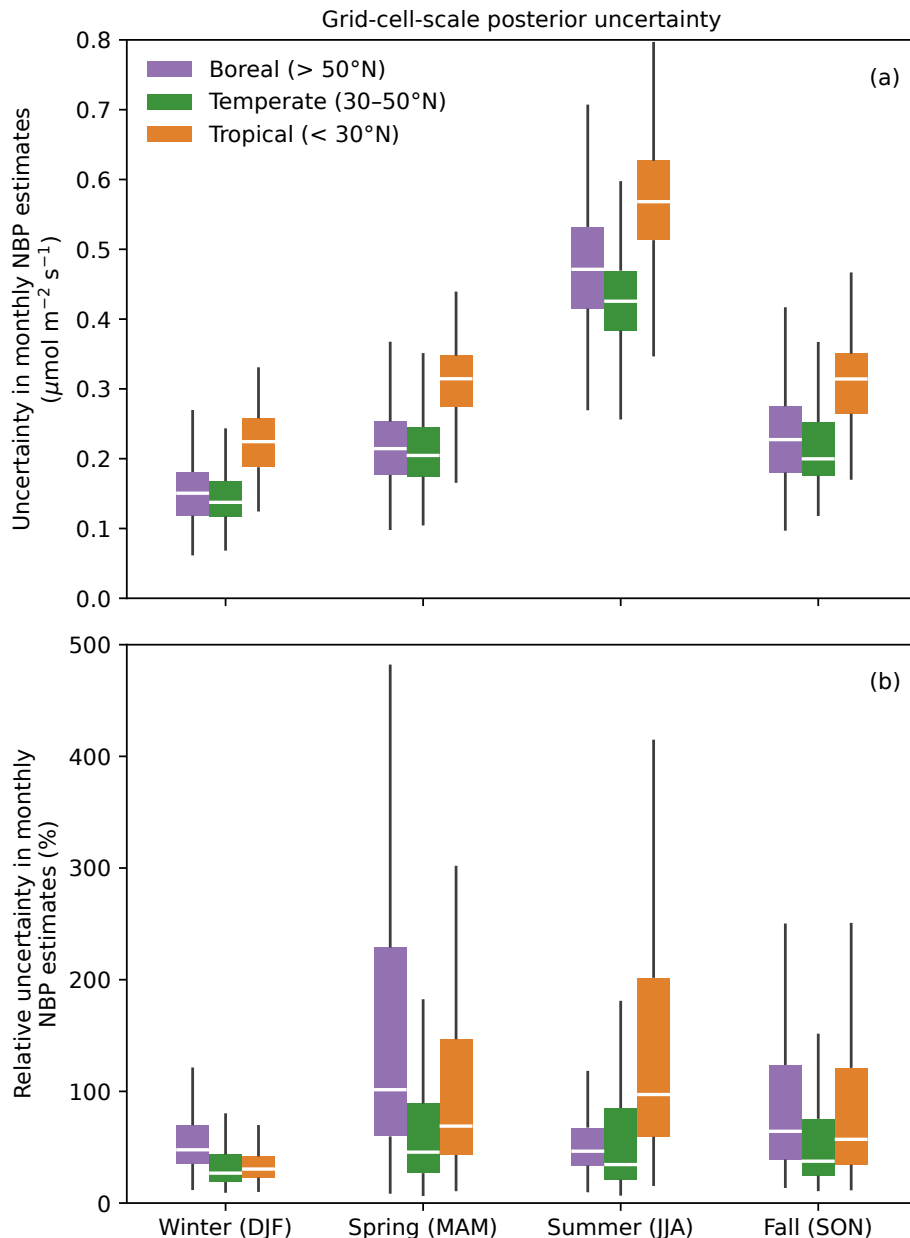

106

107 **Fig. S3.** A summary of the grid-cell-scale posterior uncertainties in monthly carbon uptake (NBP)  
 108 estimates, grouped by season and latitudinal band. (a) Boxplot of the grid-cell-scale posterior  
 109 uncertainties in monthly NBP estimates, with the center bar, bounds of box, and whiskers repre-  
 110 senting the median, first and third quartiles, smallest and largest anomalies falling within  $1.5\times$   
 111 of the interquartile range from the nearest quartiles. (b) Similar to (a) but for grid-cell-scale  
 112 relative posterior uncertainties. Note that it is typical for grid cells with near-neutral carbon flux  
 113 estimates to show large relative uncertainties. NBP estimates in the temperate zone are generally  
 114 associated with lower uncertainties and relative uncertainties than in tropical and boreal zones  
 115 due to stronger observational constraint (Fig. S1).

Supplement

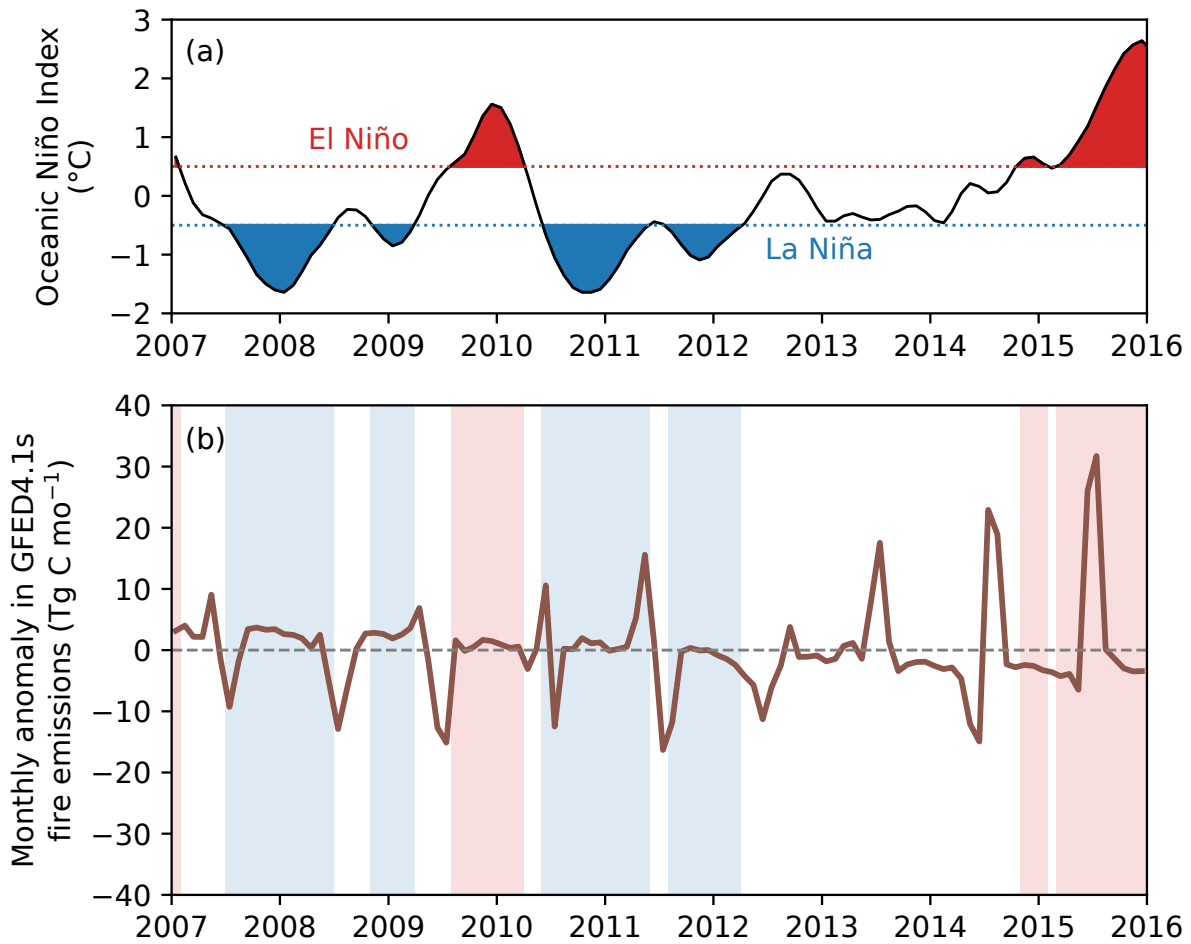

117

118 **Fig. S4.** Detrended anomalies in fire emissions from the Global Fire Emissions Database version  
 119 4.1 with small fires (GFED4.1s; van der Werf et al., 2017), presented in the same style as Fig. 2 in  
 120 the main text. (a) Monthly Oceanic Niño Index (ONI). (b) Monthly detrended anomalies in fire  
 121 emissions over North America from GFED4.1s. A positive (negative) anomaly indicates higher  
 122 (lower) fire emissions relative to the detrended mean seasonal cycle. El Niño and La Niña periods  
 123 are shaded in light red and light blue, respectively. There is no correlation between monthly fire  
 124 emission anomaly and the ONI ( $r = -0.003$ ,  $p = 0.973$ ).  
 125

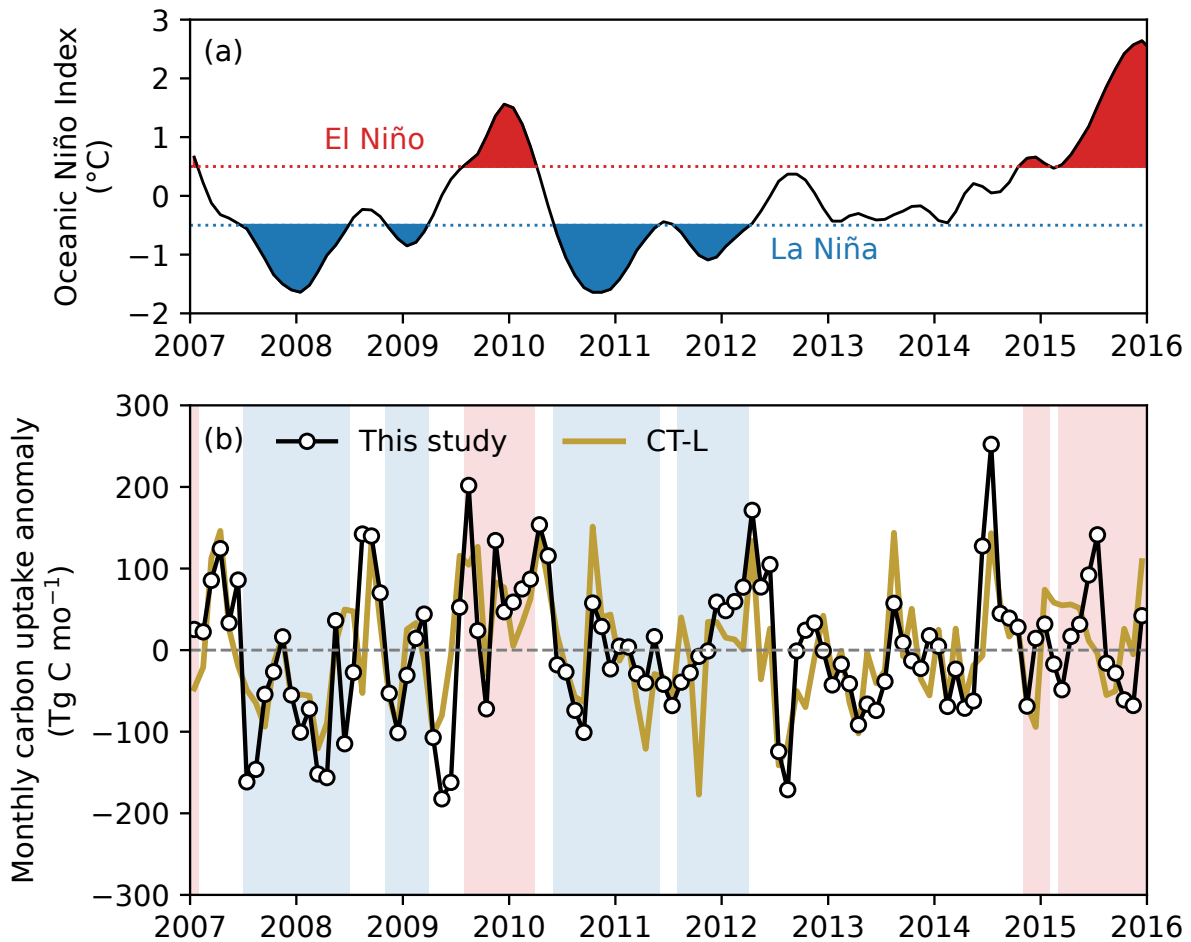

126

127 **Fig. S5.** Comparison of carbon uptake anomalies between geostatistical inverse estimates (this  
 128 study) and CarbonTracker-Lagrange (CT-L) inverse estimates (Hu et al., 2019), similar to Fig. 2  
 129 in the main text. (a) Monthly Oceanic Niño Index. (b) Monthly anomalies in net biome carbon  
 130 uptake over North America from geostatistical inverse estimates (empty circles and black line) and  
 131 from CT-L inverse estimates (dark gold line). A positive (negative) anomaly indicates enhanced  
 132 (suppressed) carbon uptake by the biosphere. El Niño and La Niña periods are shaded in light red  
 133 and light blue, respectively.

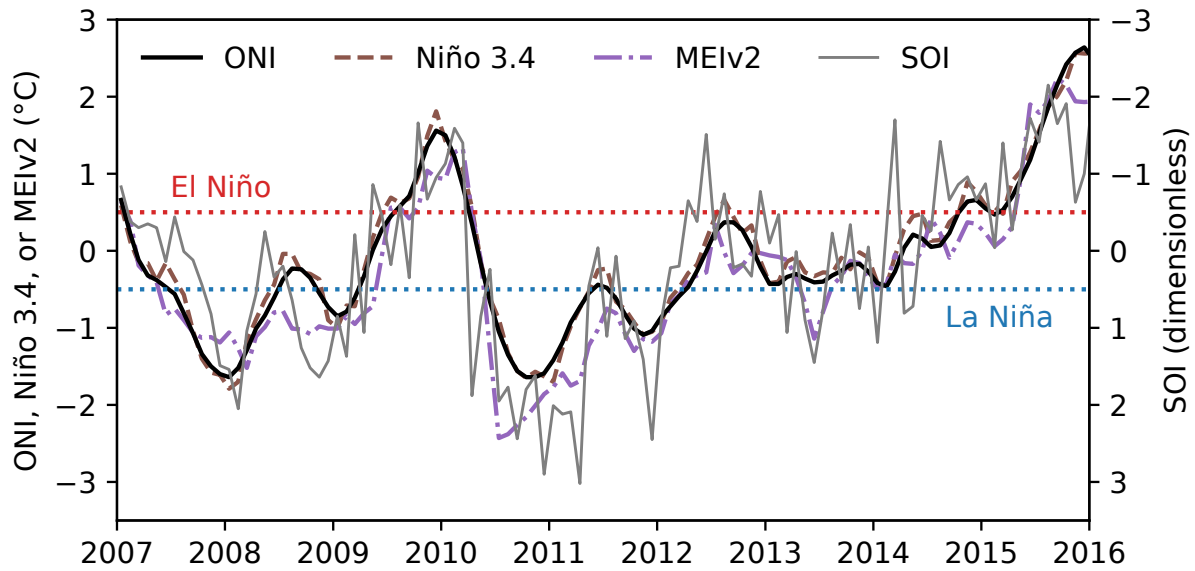

135

136 **Fig. S6.** Time series of the Oceanic Niño Index (ONI, black line), Niño 3.4 Index (brown dashed line),  
 137 Multivariate ENSO Index version 2 (MEI v2, purple dash-dotted line), and Southern Oscillation  
 138 Index (SOI, thin gray line) over 2007–2015. Note that SOI values (right vertical axis) are reversed  
 139 to align with other ENSO indices. Also shown are the thresholds for El Niño and La Niña events  
 140 in blue and red dotted lines, respectively.

Supplement

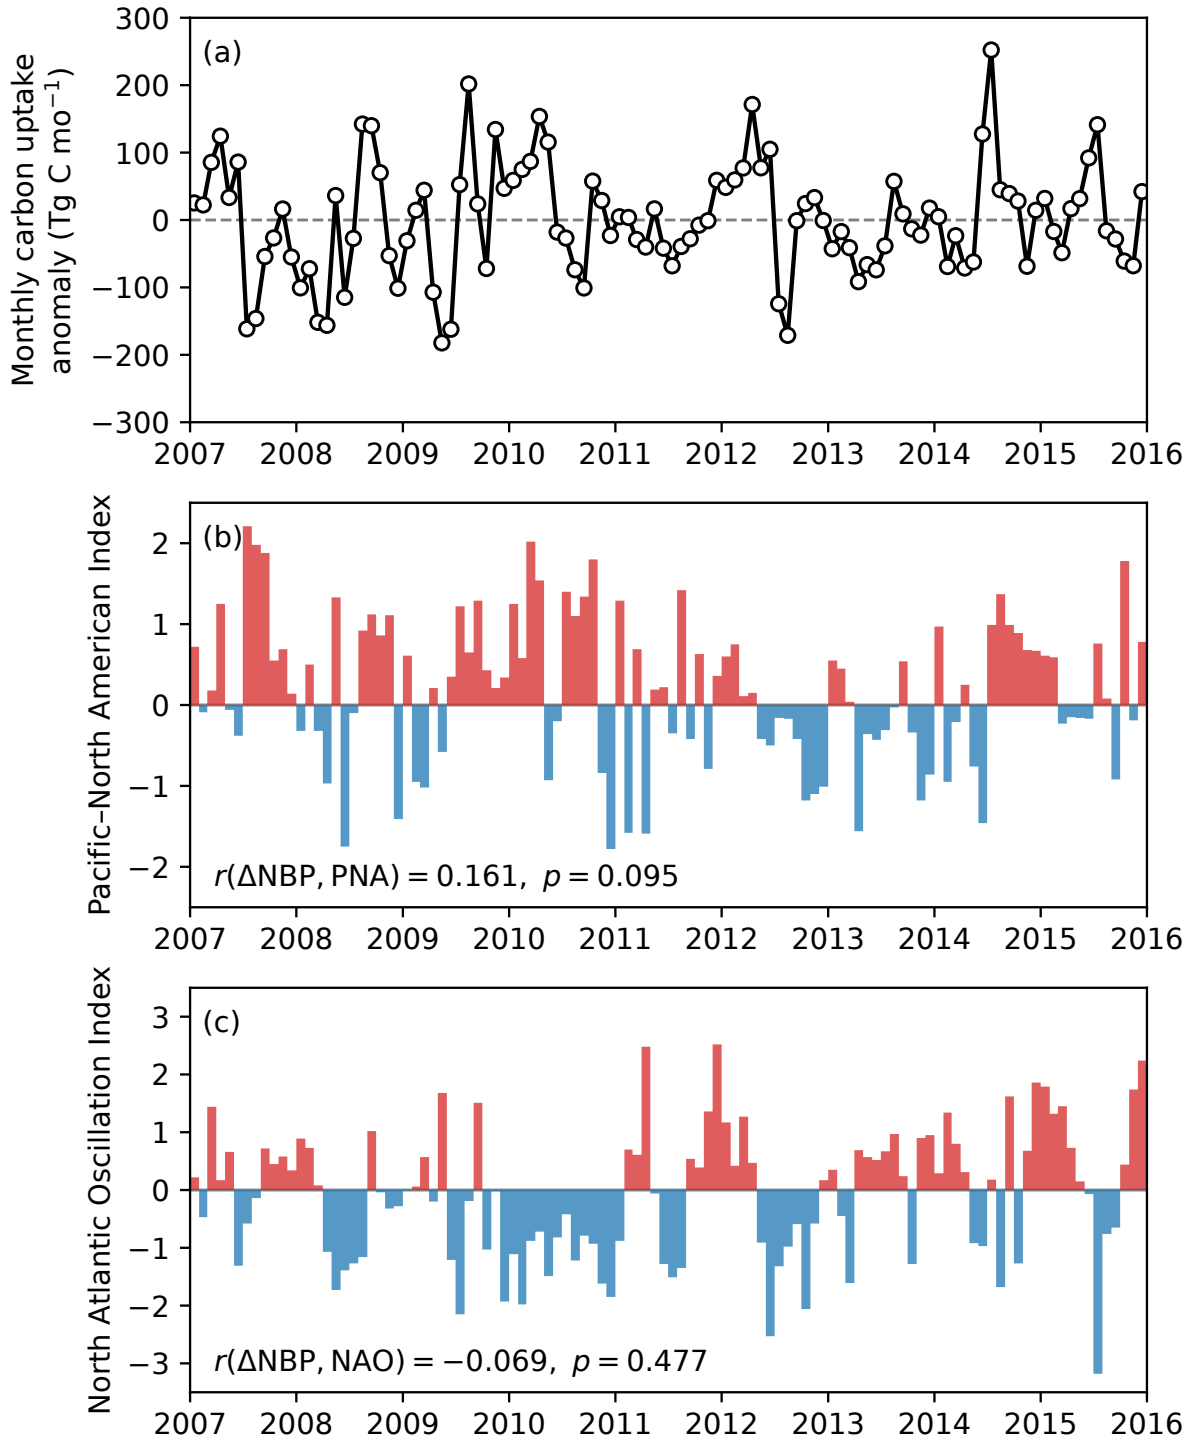

142

143 **Fig. S7.** Monthly time series of (a) carbon uptake (NBP) anomalies based on geostatistical inverse  
 144 estimates (this study), (b) the Pacific-North American (PNA) pattern index, and (c) the North  
 145 Atlantic Oscillation (NAO) index during 2007–2015. Also shown are the correlation between NBP  
 146 anomalies and the PNA index and that between NBP anomalies and the NAO index.

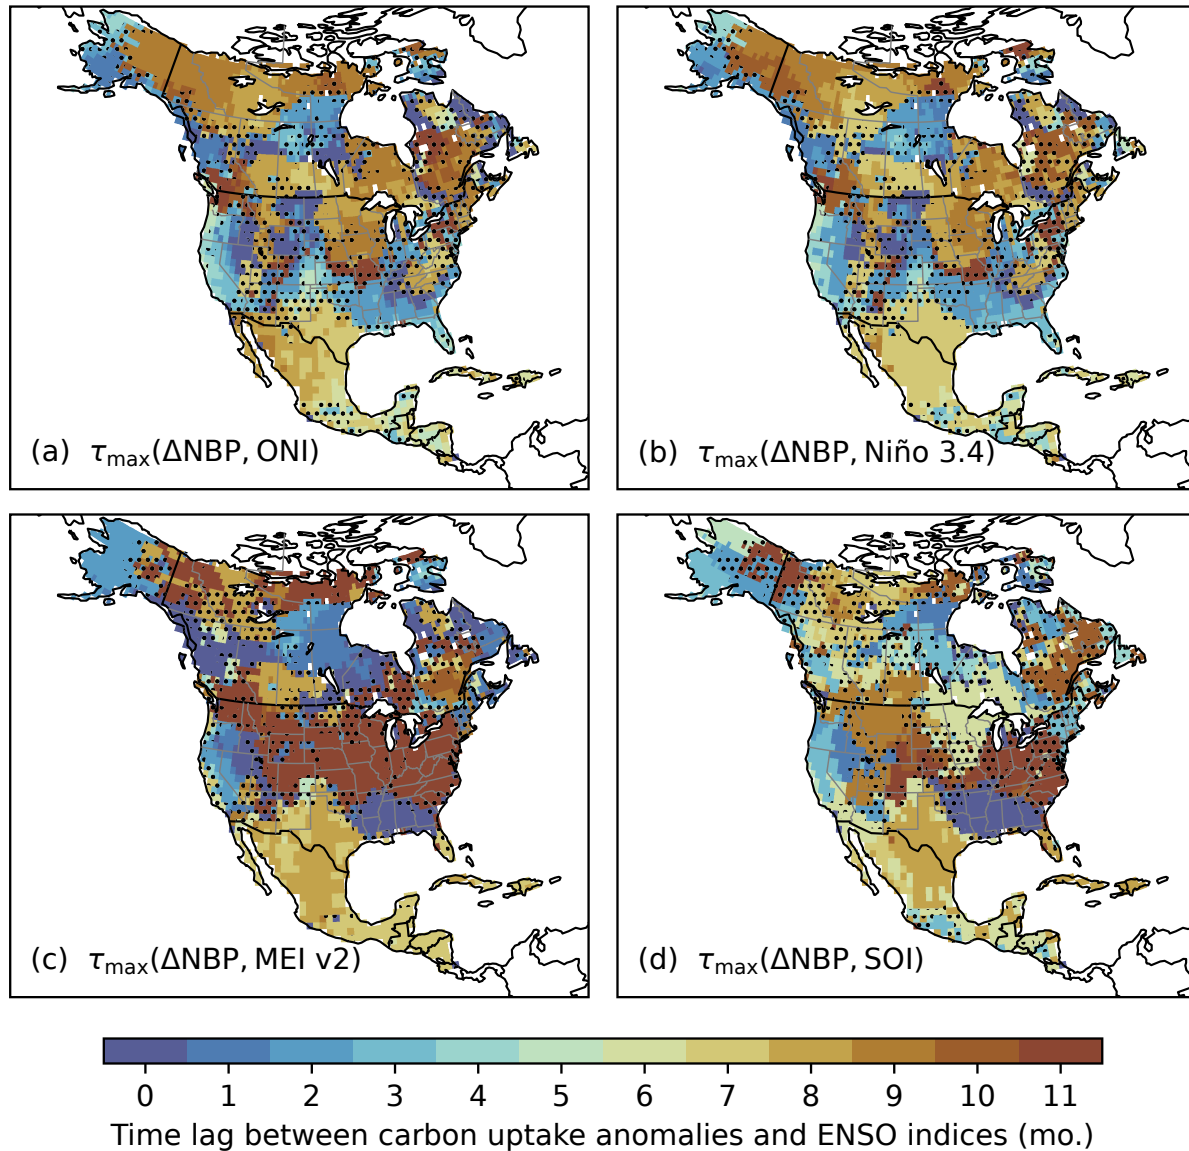

148

149 **Fig. S8.** Time lags of anomalies in net biome productivity ( $\Delta\text{NBP}$ ) relative to the Oceanic Niño  
 150 Index (ONI, a), Niño 3.4 Index (b), Multivariate ENSO Index version 2 (MEI v2, c), and Southern  
 151 Oscillation Index (SOI, d), in months. Time lags are calculated by maximizing the absolute values  
 152 of cross correlation coefficients. Stippled areas are where time lags are not robustly specified, i.e.,  
 153 when the time lag envelope for  $\Delta r = 0.05$  deviation from the maximum absolute correlation is  
 154 wider than four months (see Sect. 2.7 in the main text).

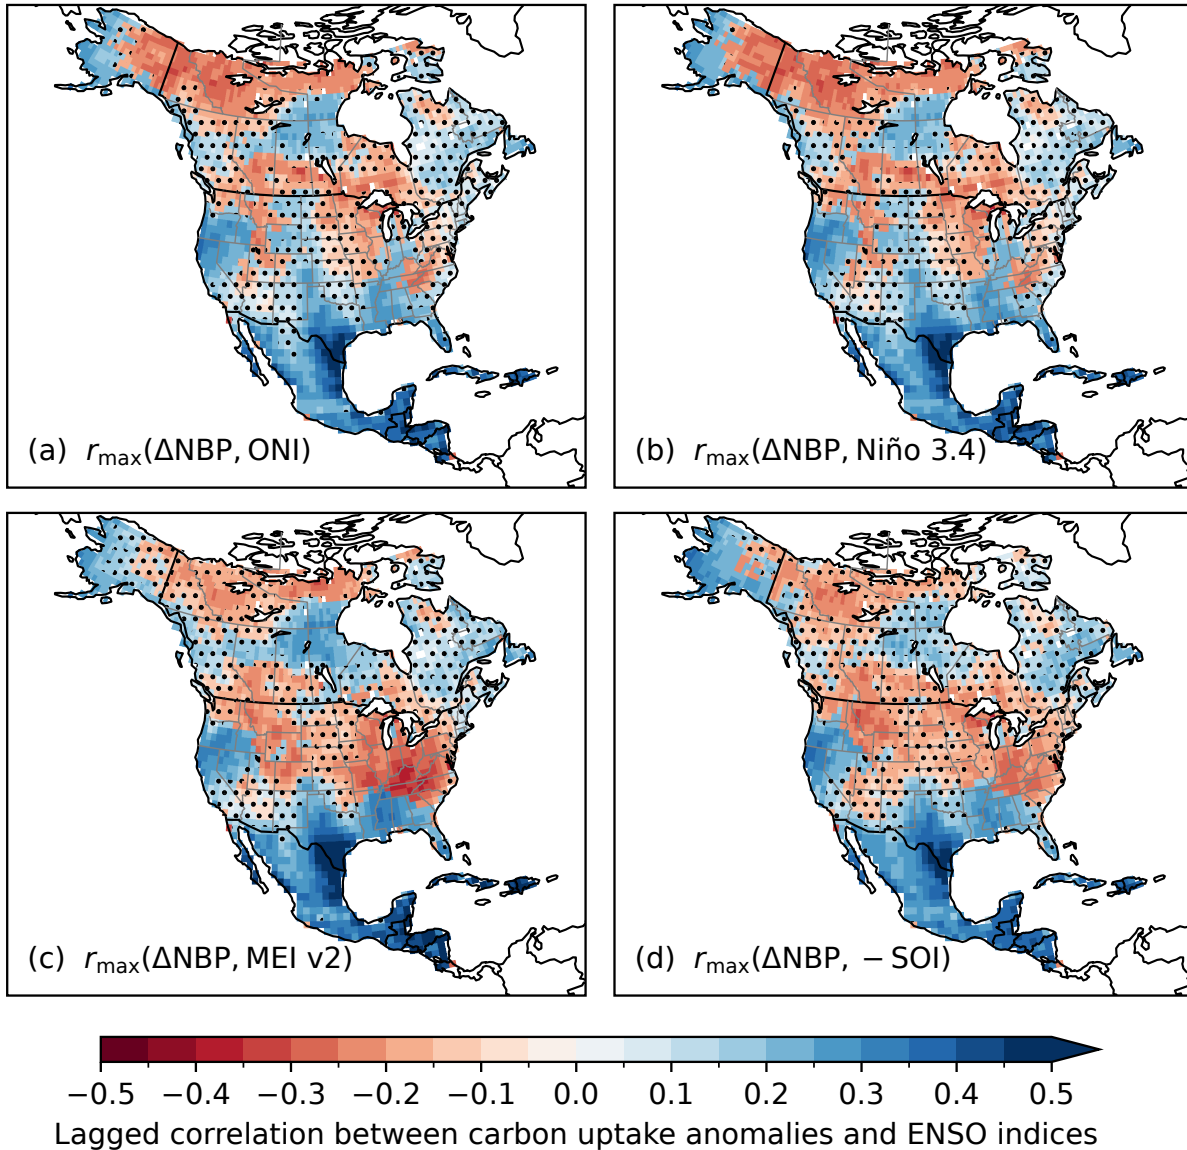

156

157 **Fig. S9.** Lagged Pearson correlations between anomalies in net biome productivity ( $\Delta\text{NBP}$ ) and  
 158 the Oceanic Niño Index (ONI, **a**), Niño 3.4 Index (**b**), Multivariate ENSO Index version 2 (MEI v2,  
 159 **c**), and the reversed Southern Oscillation Index (SOI, **d**), with the same time lags for each index  
 160 shown in Fig. S8 considered. Note that the sign of the SOI is reversed to produce a correlation  
 161 pattern (**d**) that aligns with those for other ENSO indices, due to the negative correlations between  
 162 the SOI and other ENSO indices used here (see Fig. S6). Values that are *not* statistically significant  
 163 at  $p = 0.05$  level are stippled.

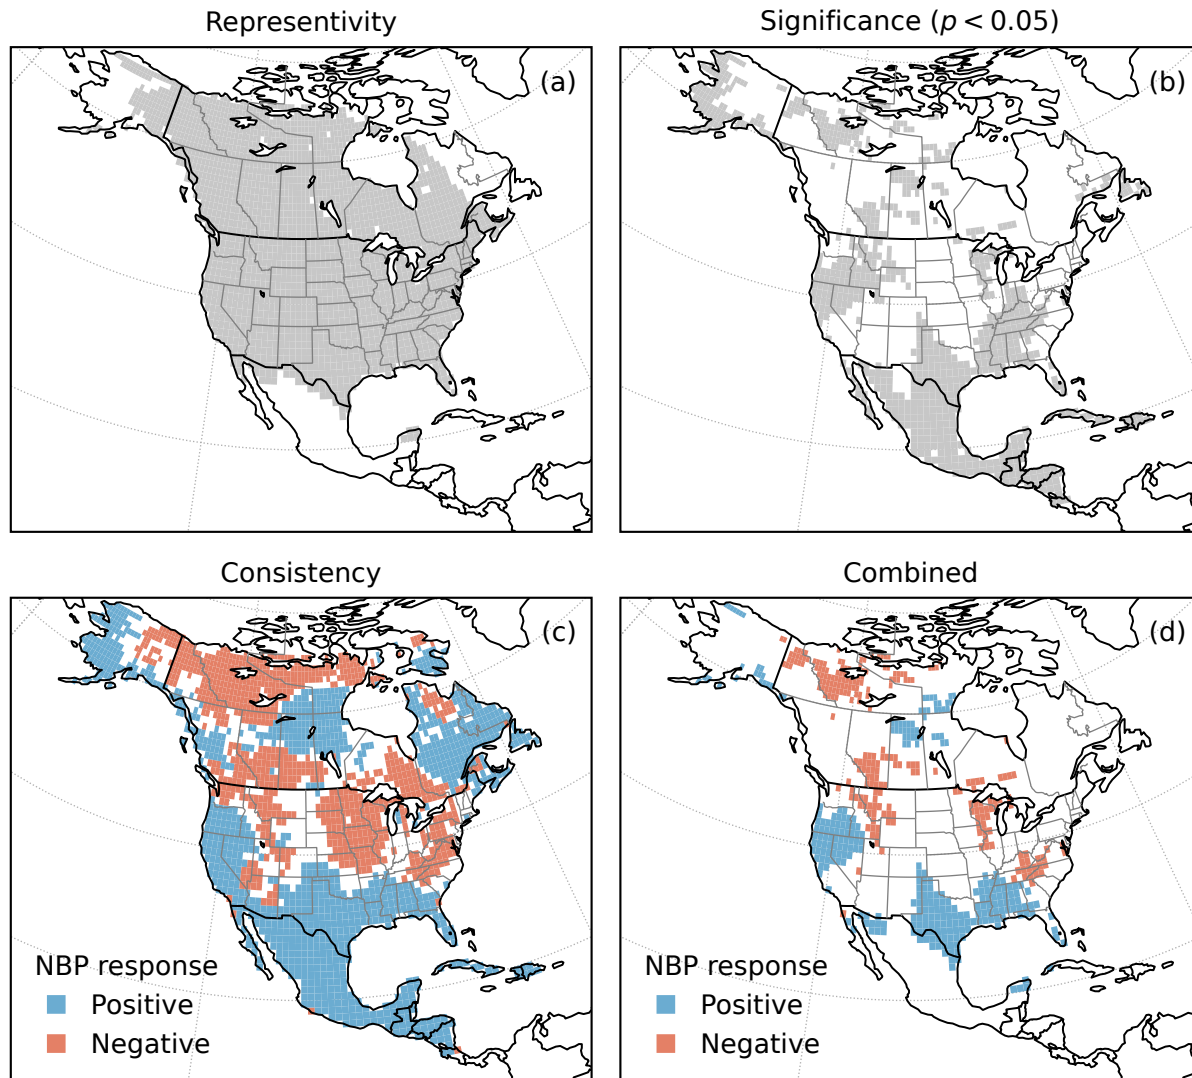

165

166 **Fig. S10.** Masks for identifying ENSO-sensitive regions. (a) Representivity mask, defined as the  
 167 area (gray) for which the sensitivity of  $\text{CO}_2$  concentration observations to surface fluxes is among  
 168 the top 80 % over North America (see Fig. S1). (b) Significance mask, defined as the area (gray) for  
 169 which lagged correlations between carbon uptake anomalies and four ENSO indices (Fig. S9) are  
 170 all significant at  $p < 0.05$  level. (c) Consistency mask, defined as the area (red and blue) for which  
 171 lagged correlations between carbon uptake anomalies and four ENSO indices have consistent  
 172 signs (Fig. S9), with grid cells showing a positive NBP response to ENSO (i.e., enhanced NBP  
 173 during El Niño) colored blue and those showing a negative response colored red. (d) Combined  
 174 mask, defined as grid cells that pass representivity, significance, and consistency criteria, with the  
 175 same color codes as (c).

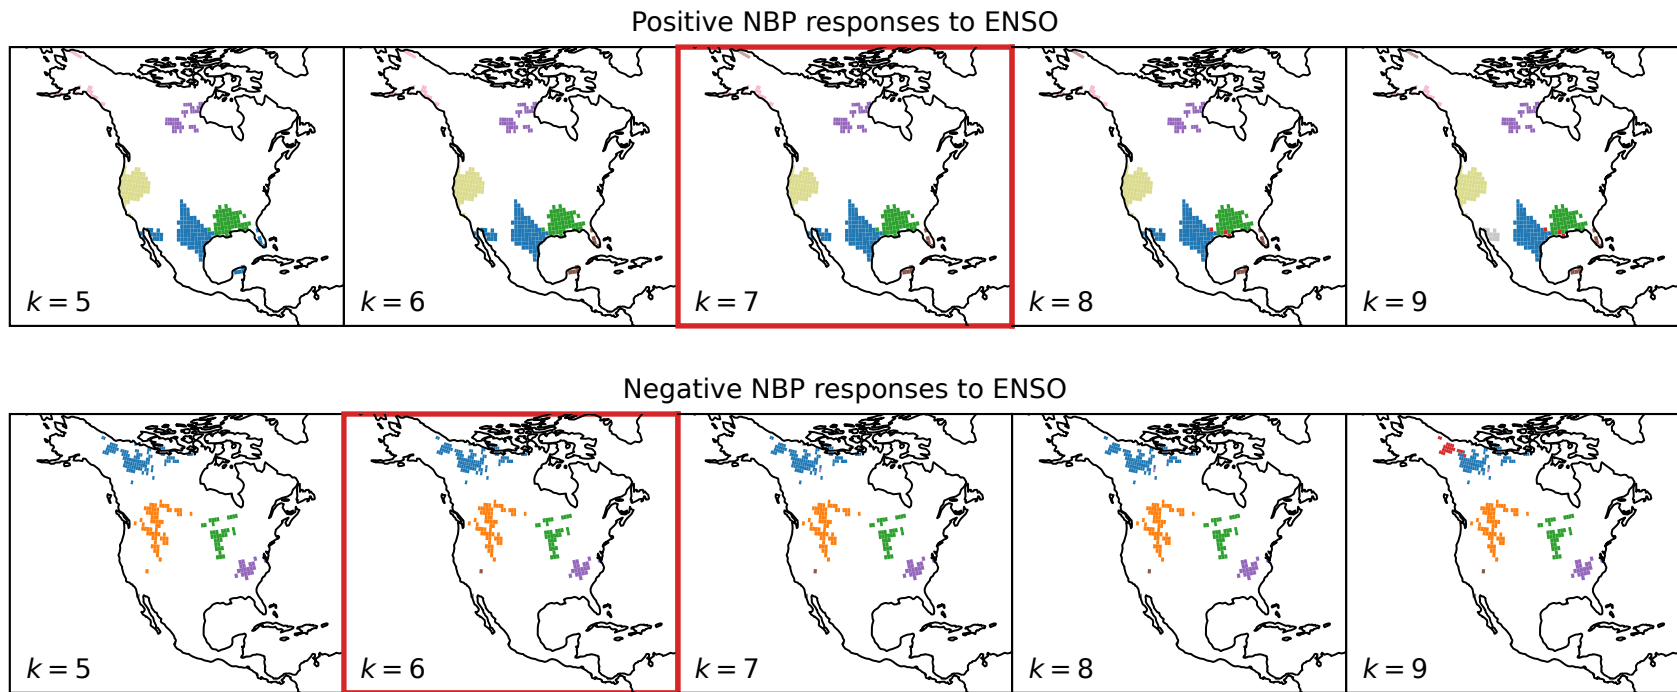

177

178 **Fig. S11.** Test of the number of ENSO-sensitive clusters. Grid cells with positive responses of carbon uptake (NBP) to ENSO (i.e.,  
 179 enhanced NBP during El Niño; top row) are clustered separately from those with negative responses (bottom row). The number of  
 180 clusters ( $k$ ) tested are from 5 to 9, and those with the most parsimonious assemblage of clusters are used in the final results (marked in  
 182 red).

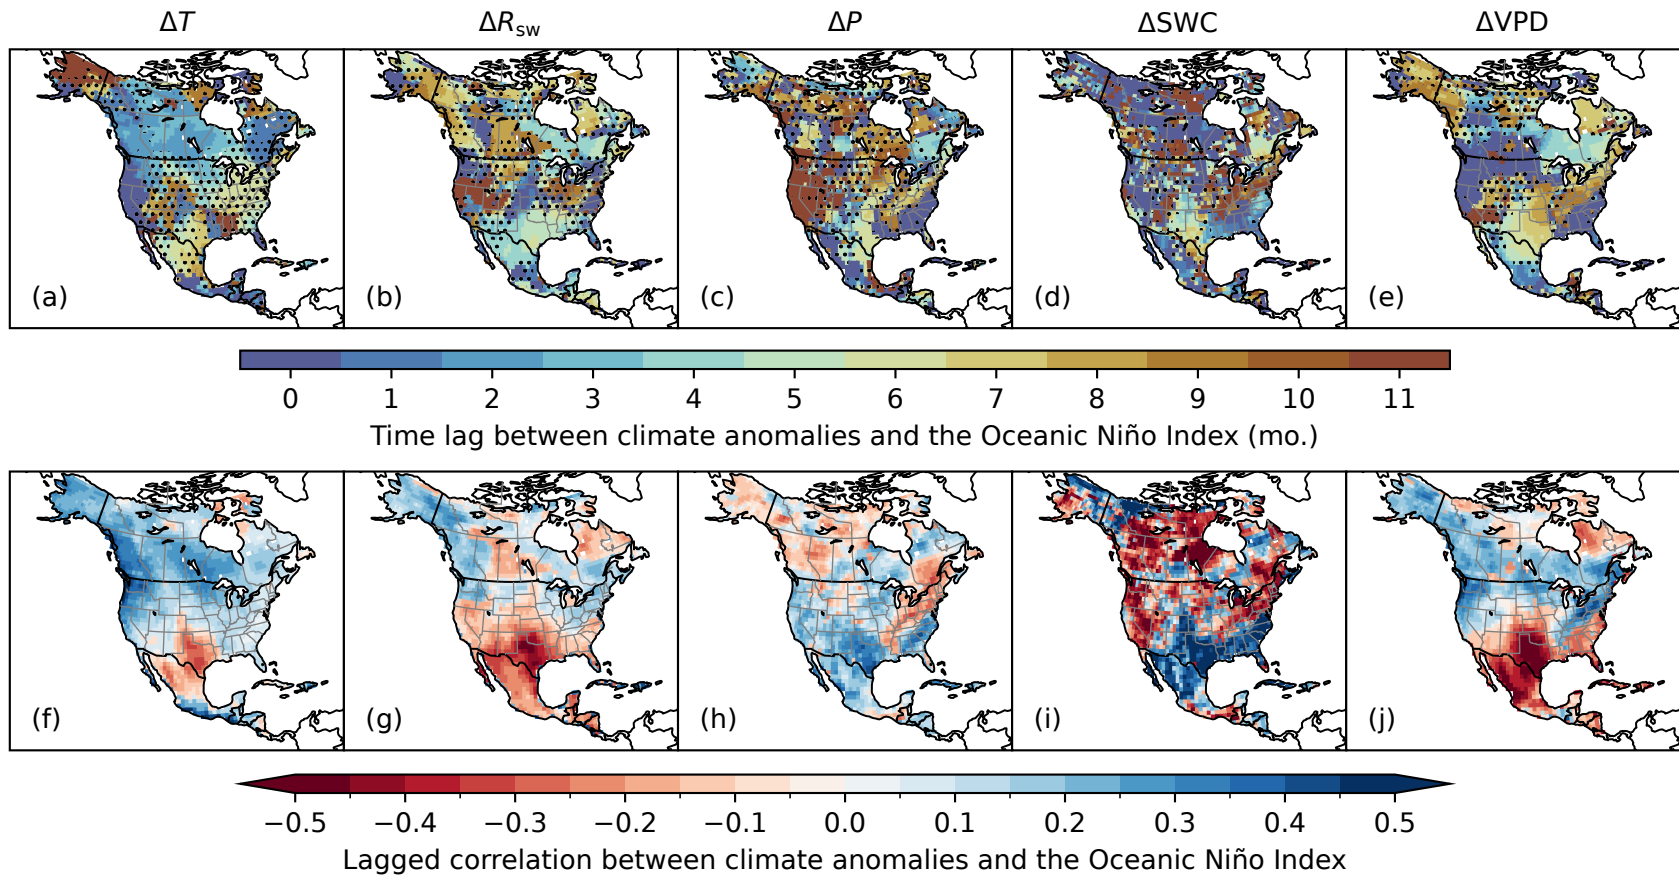

31

183

184 **Fig. S12.** Time lags of anomalies in surface air temperature ( $\Delta T$ , a), shortwave radiation ( $\Delta R_{sw}$ , b), precipitation ( $\Delta P$ , c), soil water  
 185 content ( $\Delta SWC$ , d), and vapor pressure deficit ( $\Delta VPD$ , e) relative to the Oceanic Niño Index, in months. Time lags are calculated by  
 186 maximizing the absolute values of cross correlation coefficients. Similar to Fig. S8, stippled areas are where time lags are not robustly  
 187 specified, i.e., when the time lag envelope for  $\Delta r = 0.05$  deviation from the maximum absolute correlation is wider than four months  
 188 (see Methods in the main text). Also shown are lagged Pearson correlations between climate anomalies and the Oceanic Niño Index  
 190 (f–j), with the same time lags corresponding to each climate variable (a–e) considered.

Supplement

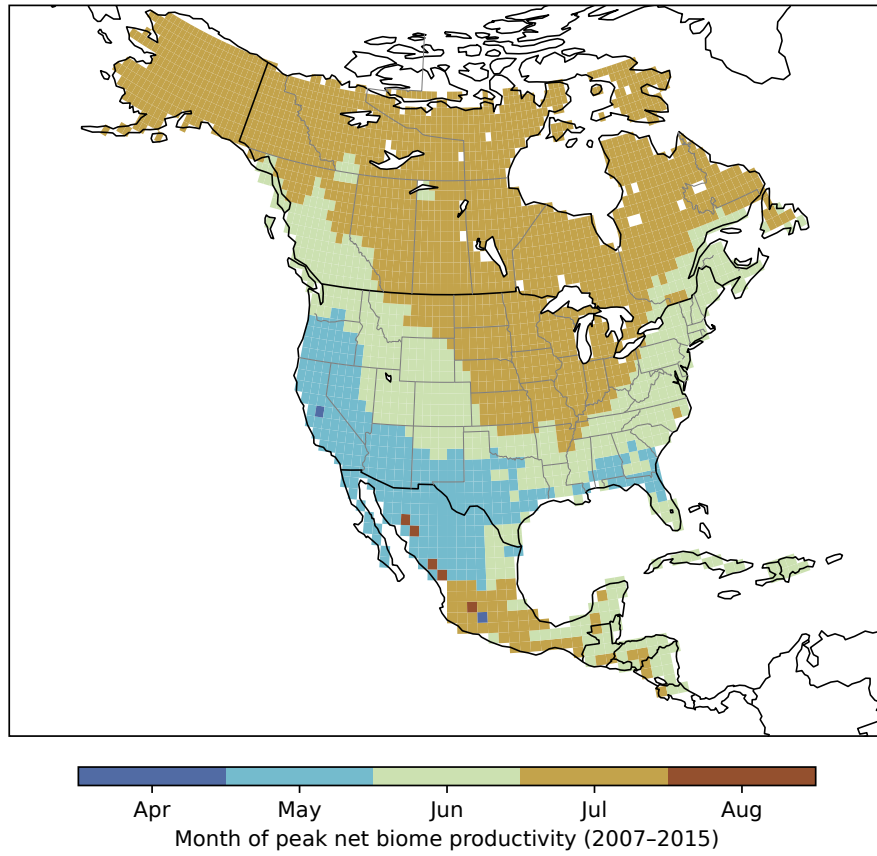

191

192 **Fig. S13.** Spatial pattern of the month of peak net biome productivity, identified from the multi-year  
193 (2007–2015) mean seasonal cycle at each grid cell.

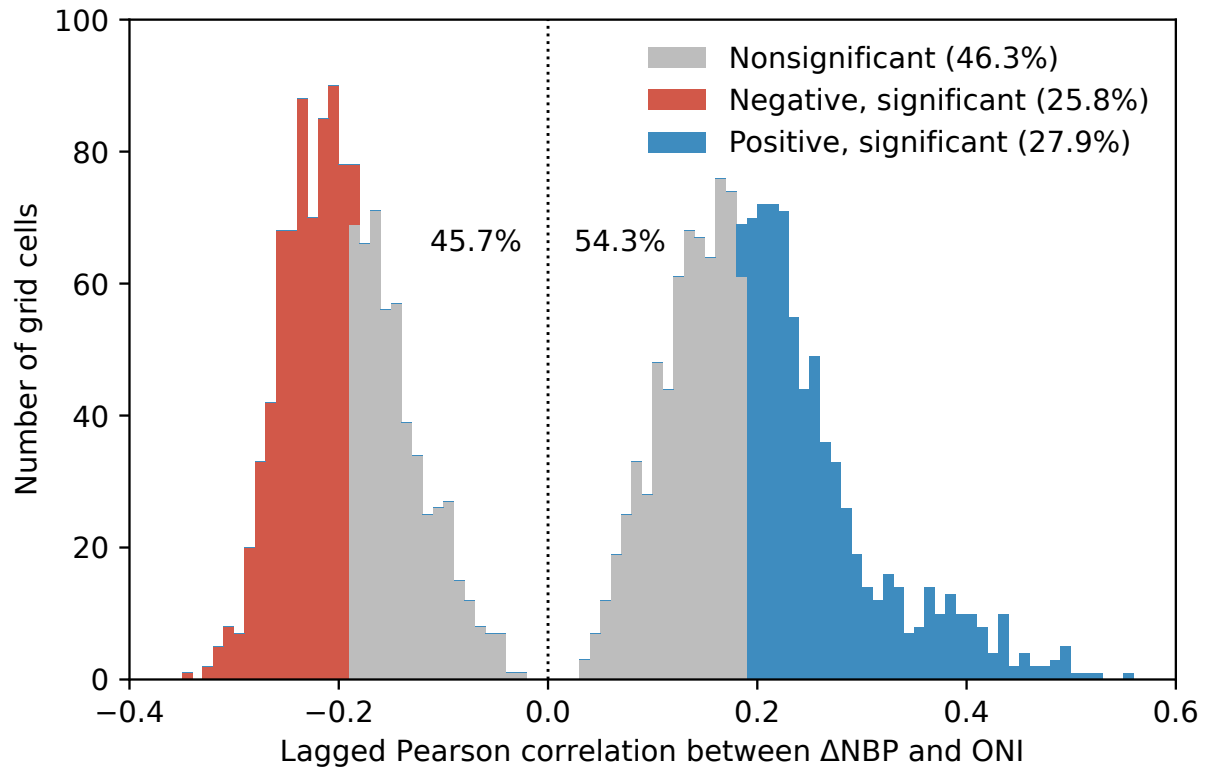

195

196 **Fig. S14.** Histogram of lagged Pearson correlations between carbon uptake anomalies ( $\Delta\text{NBP}$ ) and  
 197 the Oceanic Niño Index (ONI). The majority of grid cells (54.3%) and area (59.6%) show a positive  
 198 correlation between carbon uptake anomalies and the ONI (right side of the vertical dashed line).  
 199 27.9% (25.8%) of all grid cells, which occupy 32.2% (20.6%) of the total area of North America,  
 200 show a statistically significant ( $p < 0.05$ ) positive (negative) correlation between  $\Delta\text{NBP}$  and ONI.

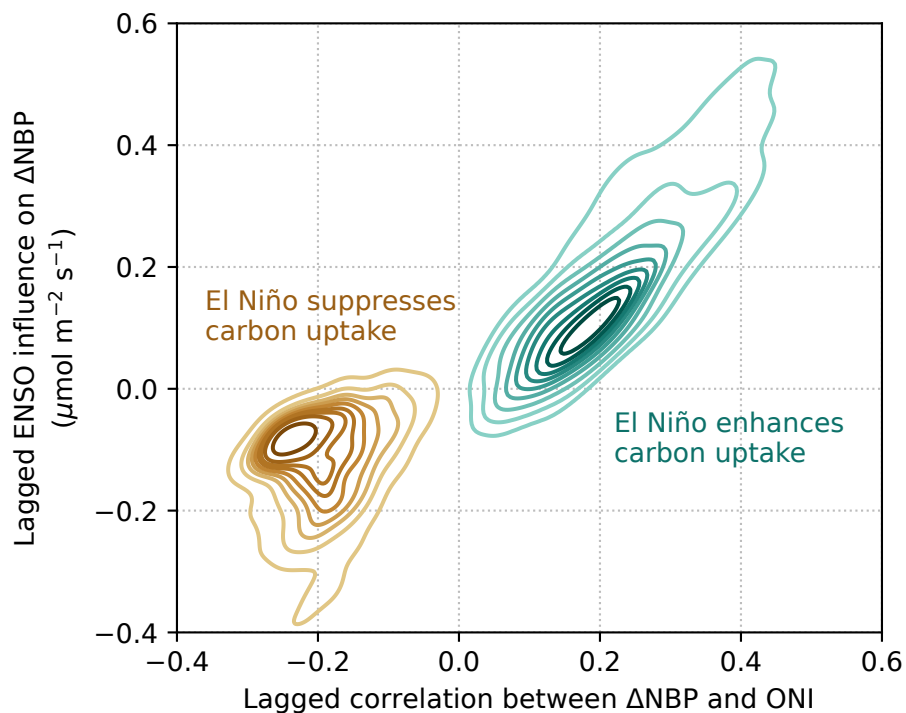

202

203 **Fig. S15.** Across grid cells, El Niño enhancement of carbon uptake (turquoise) dominates its  
 204 suppression of carbon uptake (brown). Values on the horizontal axis correspond to the lagged  
 205 correlations shown in Fig. 1b in the main text, whereas those on the vertical axis correspond to  
 206 ENSO composite influences (El Niño – La Niña) on carbon uptake anomalies ( $\Delta\text{NBP}$ ) shown in  
 207 Fig. 1c in the main text. Contours represent the first decile (0–10 %) to the ninth decile (80–90 %)  
 208 of the statistical distribution based on 2-D kernel density estimation. The “enhancement” cluster  
 209 (turquoise) shows disproportionately larger ENSO influence on  $\Delta\text{NBP}$  in than the “suppression”  
 210 cluster (brown), giving rise to the aggregated North American response: El Niño enhances the  
 212 North American land carbon sink.

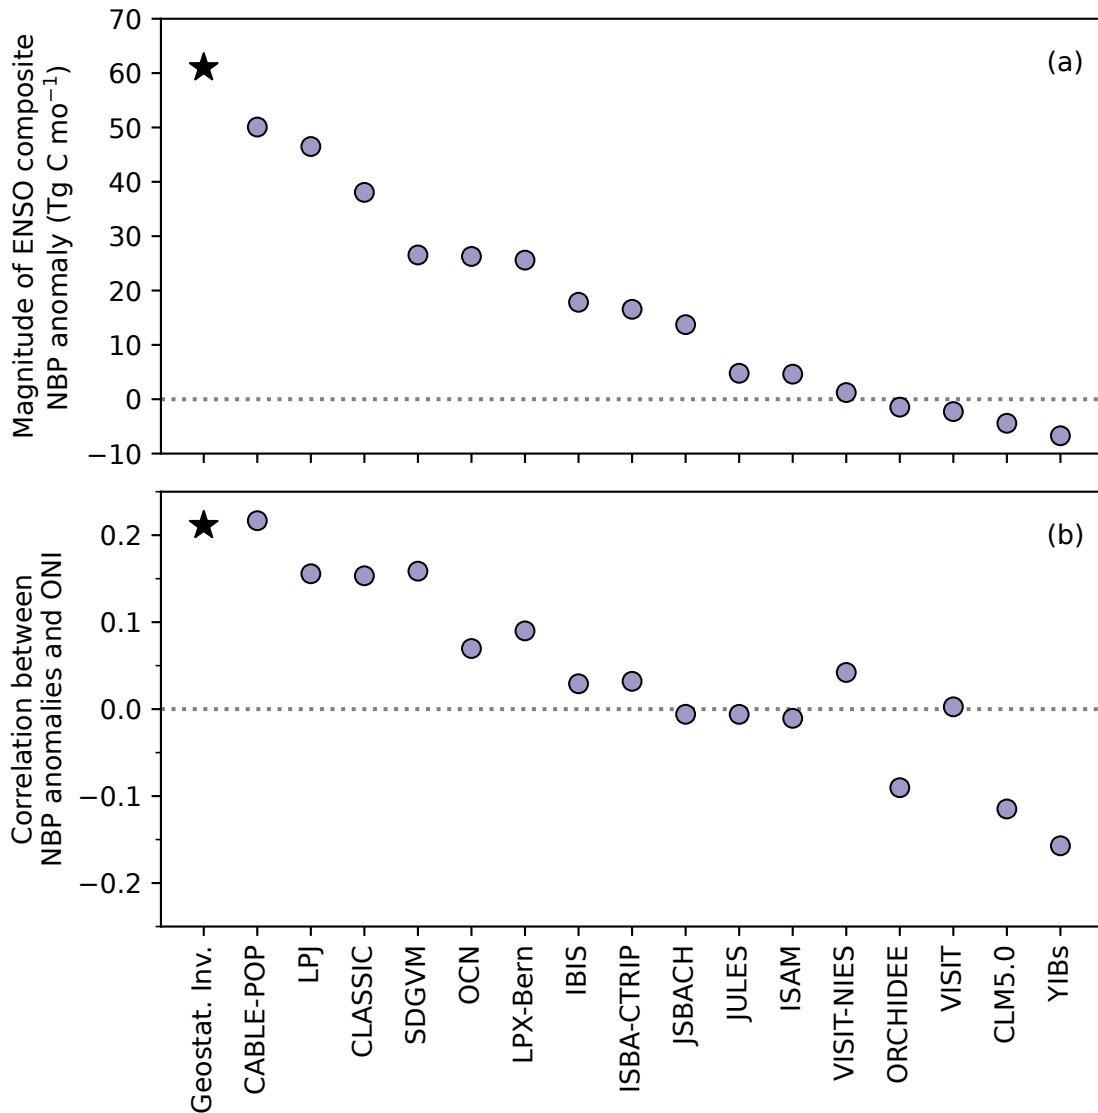

213

214 **Fig. S16.** Comparison of ENSO impact on North American aggregated carbon uptake (NBP)  
 215 between geostatistical inverse estimates (this study) and members of the TRENDY v11 model  
 216 ensemble (Friedlingstein et al., 2022; Sitch et al., 2024). (a) Magnitudes of ENSO composite  
 217 differences (El Niño – La Niña) in aggregated North American NBP anomalies during 2007–  
 218 2015, for the geostatistical inversion (star) and TRENDY models (circles). Models are ranked in  
 219 descending order by the ENSO composite anomaly. A small subset of TRENDY models show  
 220 the opposite sign of ENSO impact (i.e., negative NBP anomaly during El Niño). (b) Correlations  
 221 between monthly North American aggregated NBP anomalies and the Oceanic Niño Index (ONI)  
 222 across the same set of models (following the same order as in a).

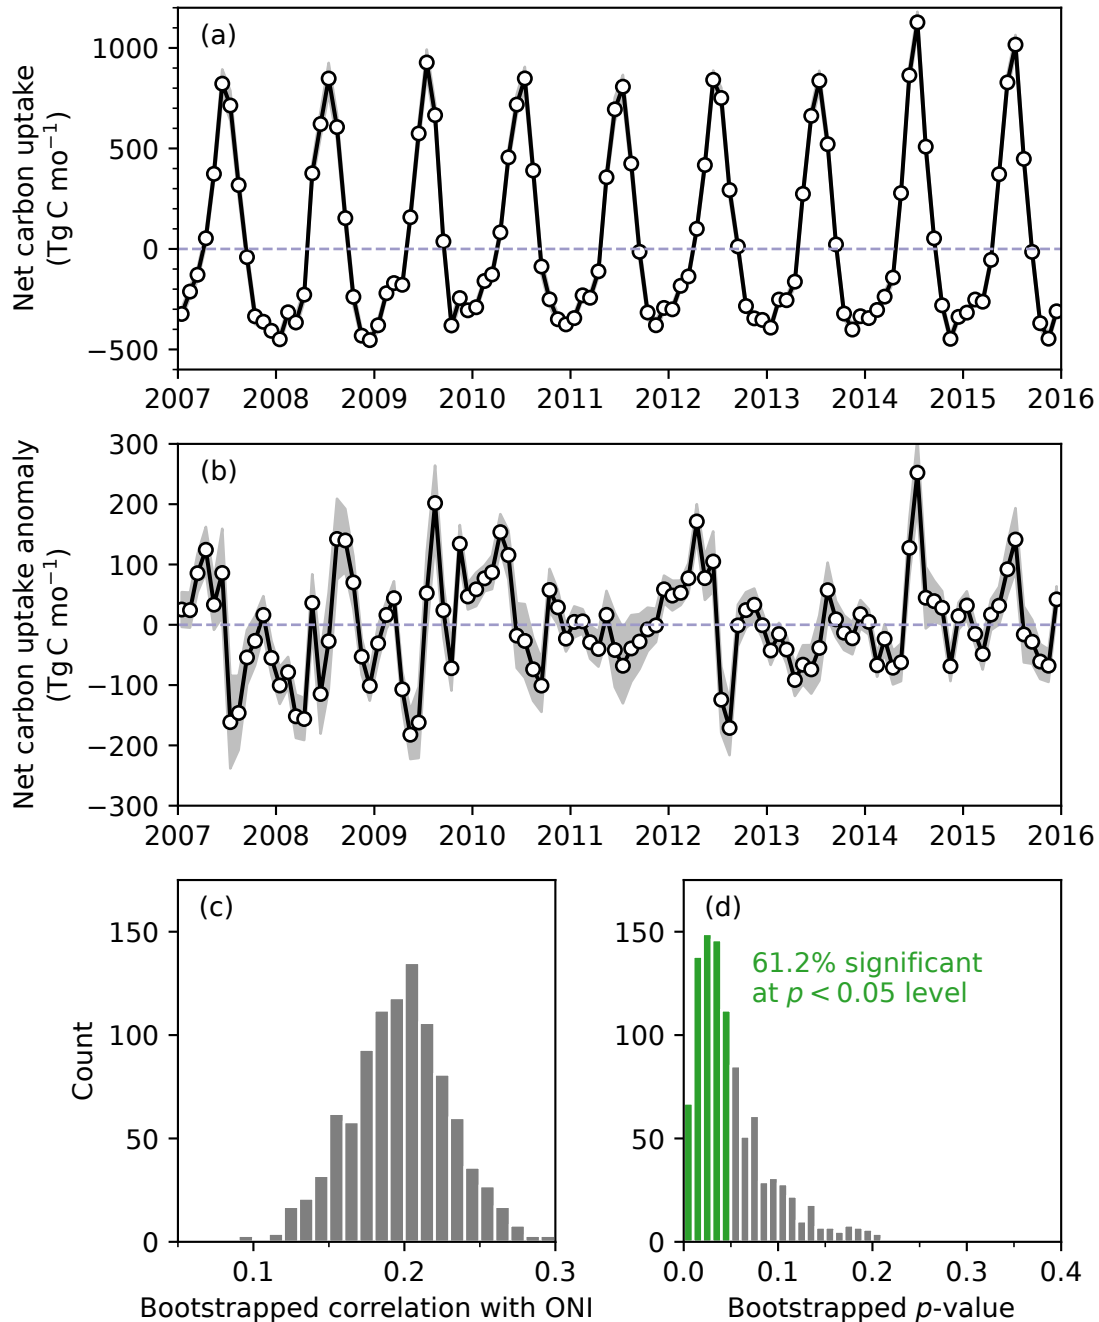

224

225 **Fig. S17.** Posterior uncertainty in net biome carbon uptake anomalies over North America and its  
 226 implications for the robustness of ENSO impact. (a) Monthly net biome carbon uptake aggregated  
 227 over North America, with  $\pm 1\sigma$  uncertainty shown in gray shading. (b) Similar to (a) but for  
 228 deseasonalized anomalies in North American net biome carbon uptake, with  $\pm 1\sigma$  uncertainty in  
 229 gray. (c and d) Statistical distributions of the correlation between carbon uptake anomalies and  
 230 the Oceanic Niño Index (ONI) and the associated  $p$ -value based on bootstrapping the uncertainty  
 231 range of flux estimates for  $N = 1000$  times.

Supplement

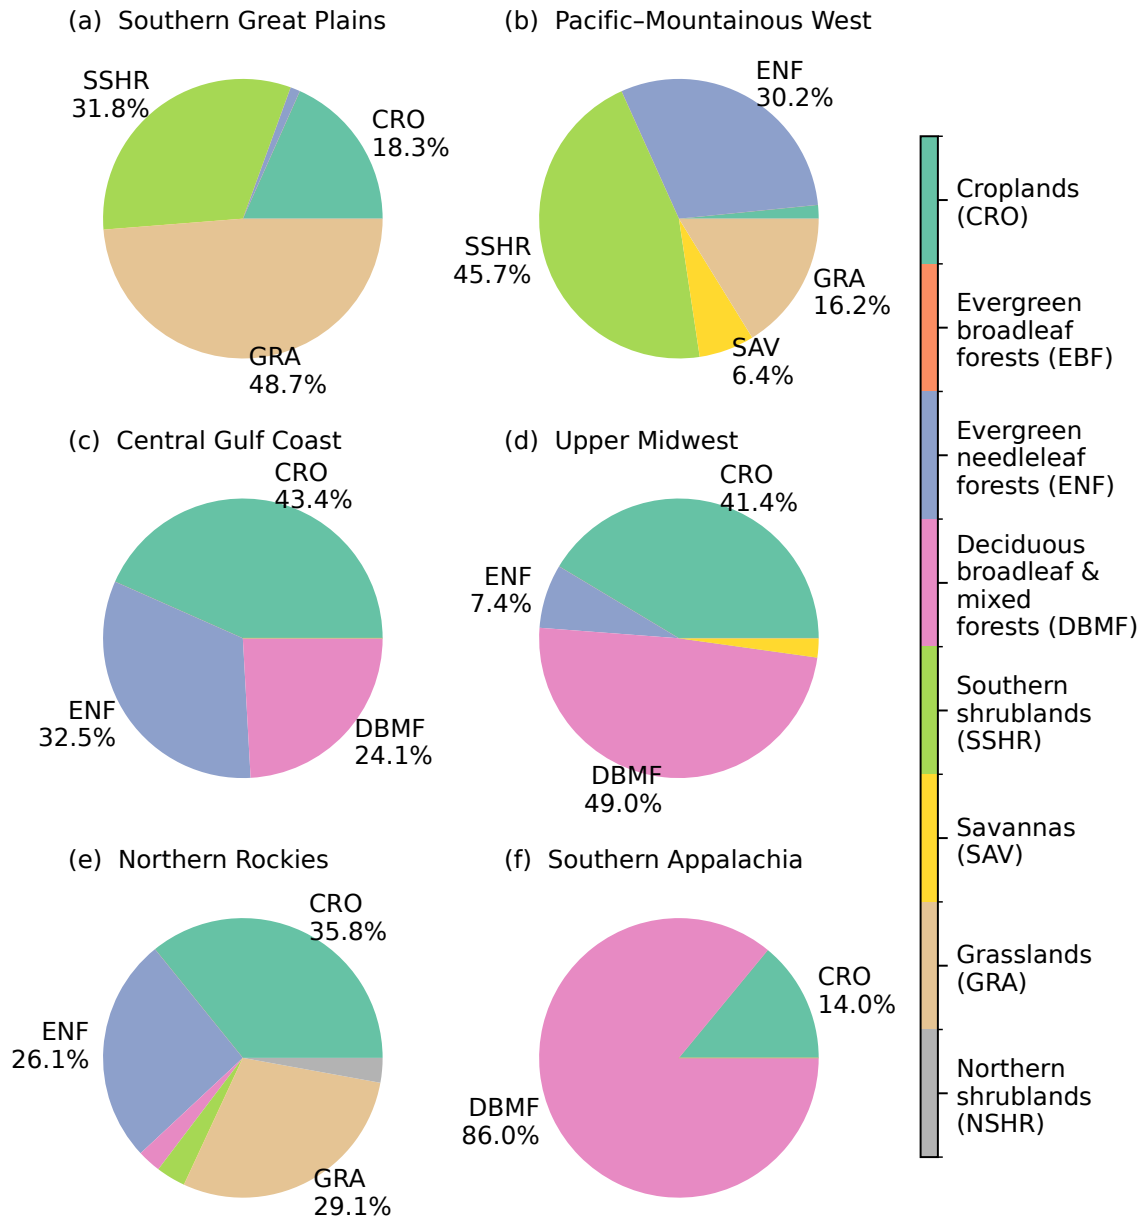

233

234 **Fig. S18.** Pie charts of biome areal fractions in each identified ENSO-sensitive region in temperate  
 235 North America. Biomes that cover more than 5 % of a region are labeled in pie charts.

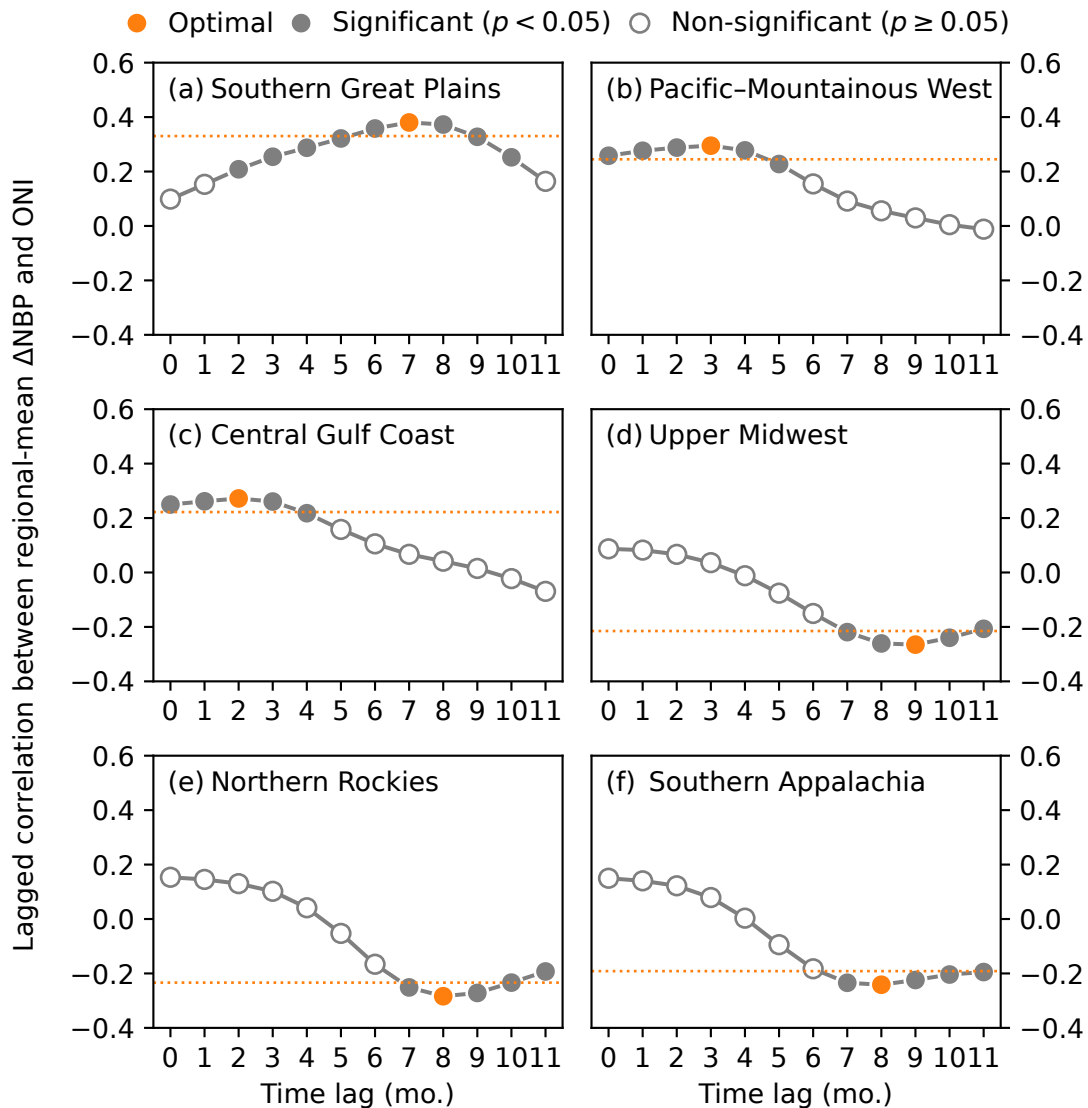

237

238 **Fig. S19.** Lagged correlations between regional-mean carbon uptake anomalies ( $\Delta\text{NBP}$ ) and the  
 239 Oceanic Niño Index (ONI) for ENSO-sensitive regions. Solid circles (gray or orange) represent  
 240 correlations that are statistically significant ( $p < 0.05$ ) and empty circles represent those that are  
 241 not. The optimal correlation and time lag (orange) for each region is determined by maximizing the  
 242 absolute value of the cross correlation with a time lag of 0–11 months. The dashed line indicates  
 243  $\Delta r = 0.05$  deviation from the optimal correlation, for assessing robustness of the optimal time lag.

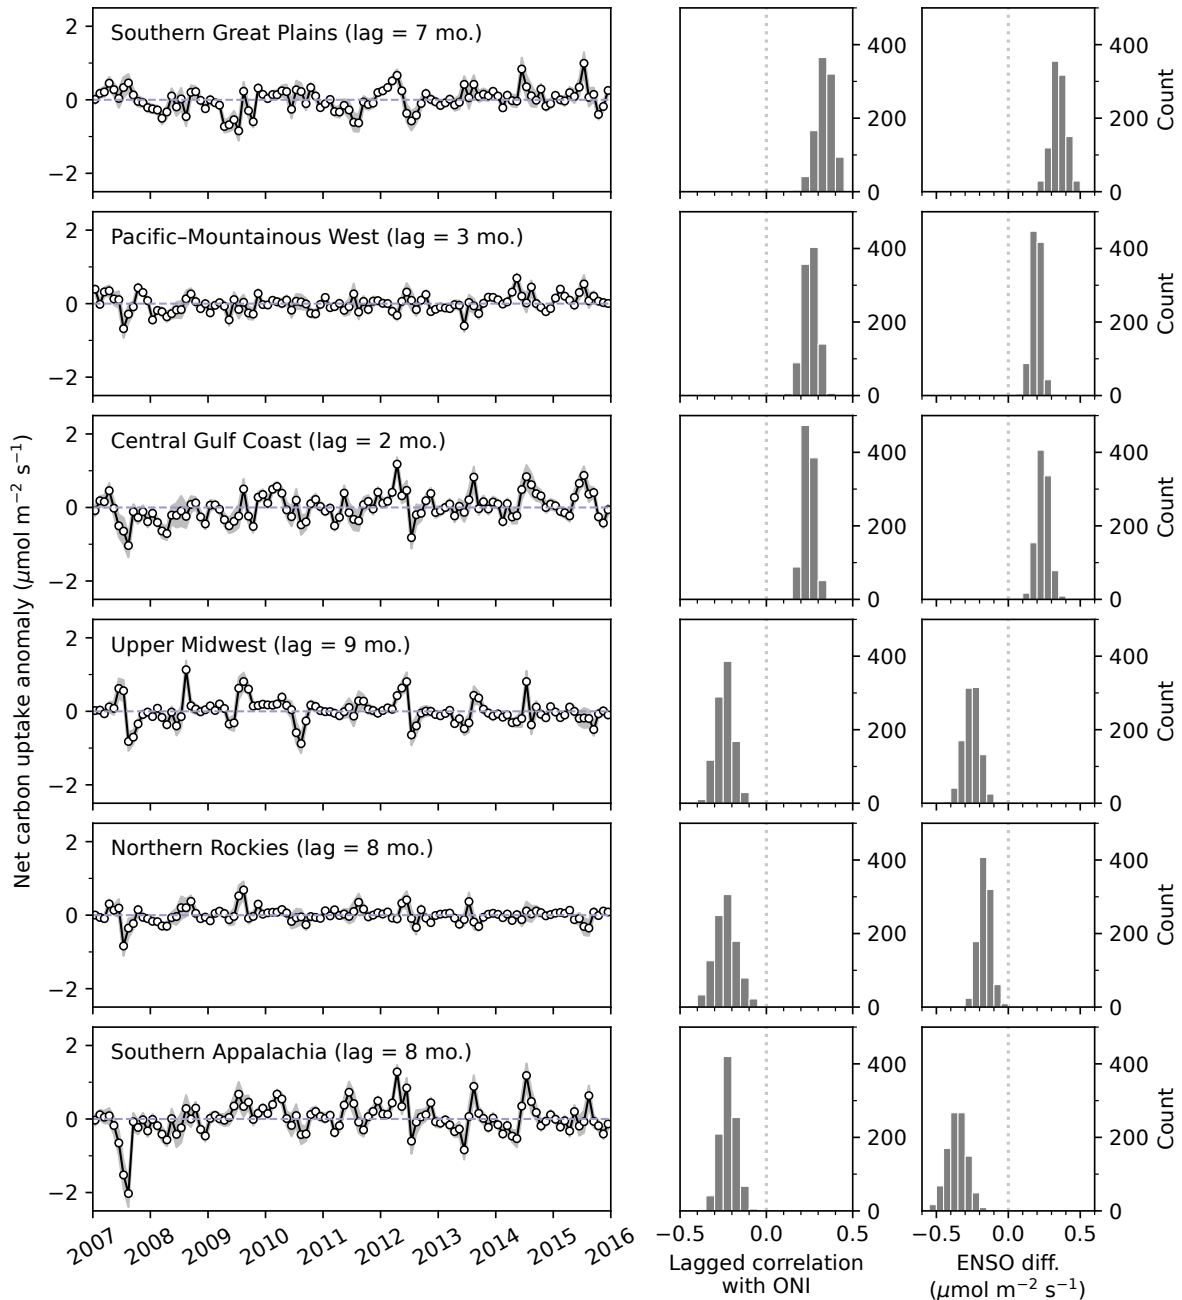

245

246 **Fig. S20.** Posterior uncertainty in net biome carbon uptake anomalies across temperate ENSO-  
 247 sensitive regions and implications for the robustness of regional ENSO impacts. (Left column)  
 248 Regional-mean monthly net carbon uptake anomalies, with  $\pm 1\sigma$  uncertainty shown in gray  
 249 shading. (Middle column) Bootstrapped distribution of the lagged correlation between regional-  
 250 mean monthly net carbon uptake anomalies and the Oceanic Niño Index (ONI) for each region,  
 251 based on bootstrapping the uncertainty range of flux estimates for  $N = 1000$  times. (Right column)  
 252 Similar to the middle column but for bootstrapped distribution of the ENSO composite difference  
 253 (El Niño – La Niña) in net carbon uptake anomalies for each region.

Supplement

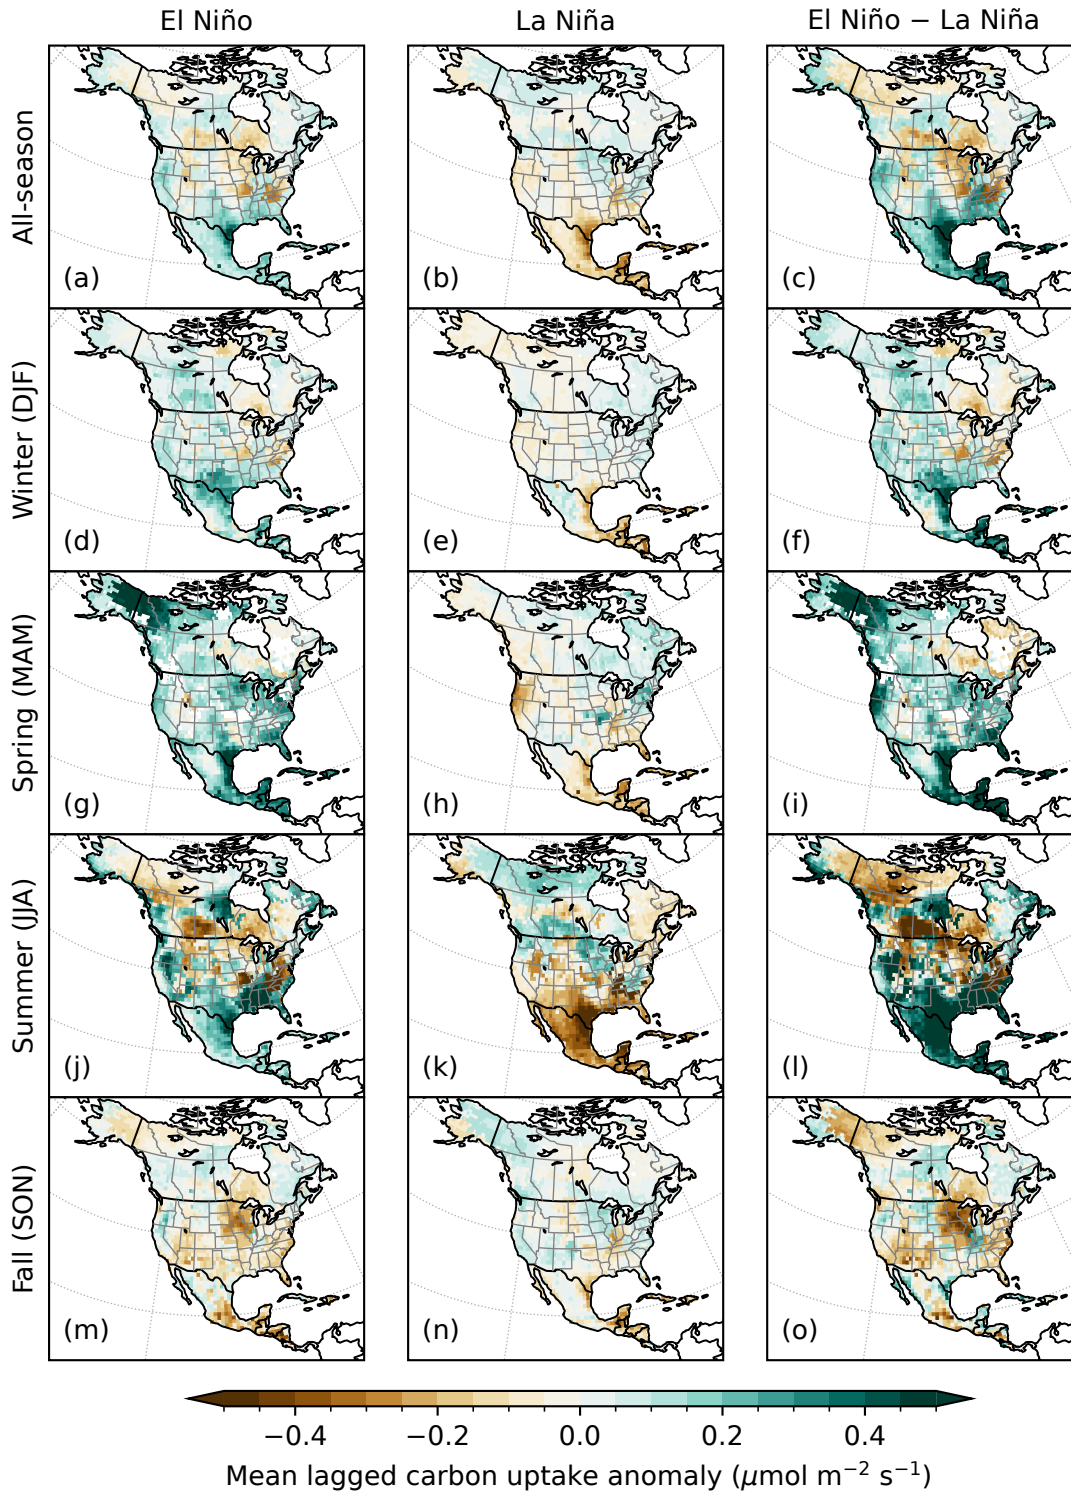

255

256 **Fig. S21.** Seasonal patterns of lagged net carbon uptake (i.e., net biome productivity) anomalies  
 257 during El Niño (left column) and La Niña (center column) and of ENSO composite differences  
 258 in net carbon uptake (right column), with the same time lags in Fig. 1a (main text) considered.  
 260 Different rows indicate seasonal periods: all-season, winter, spring, summer, and fall.

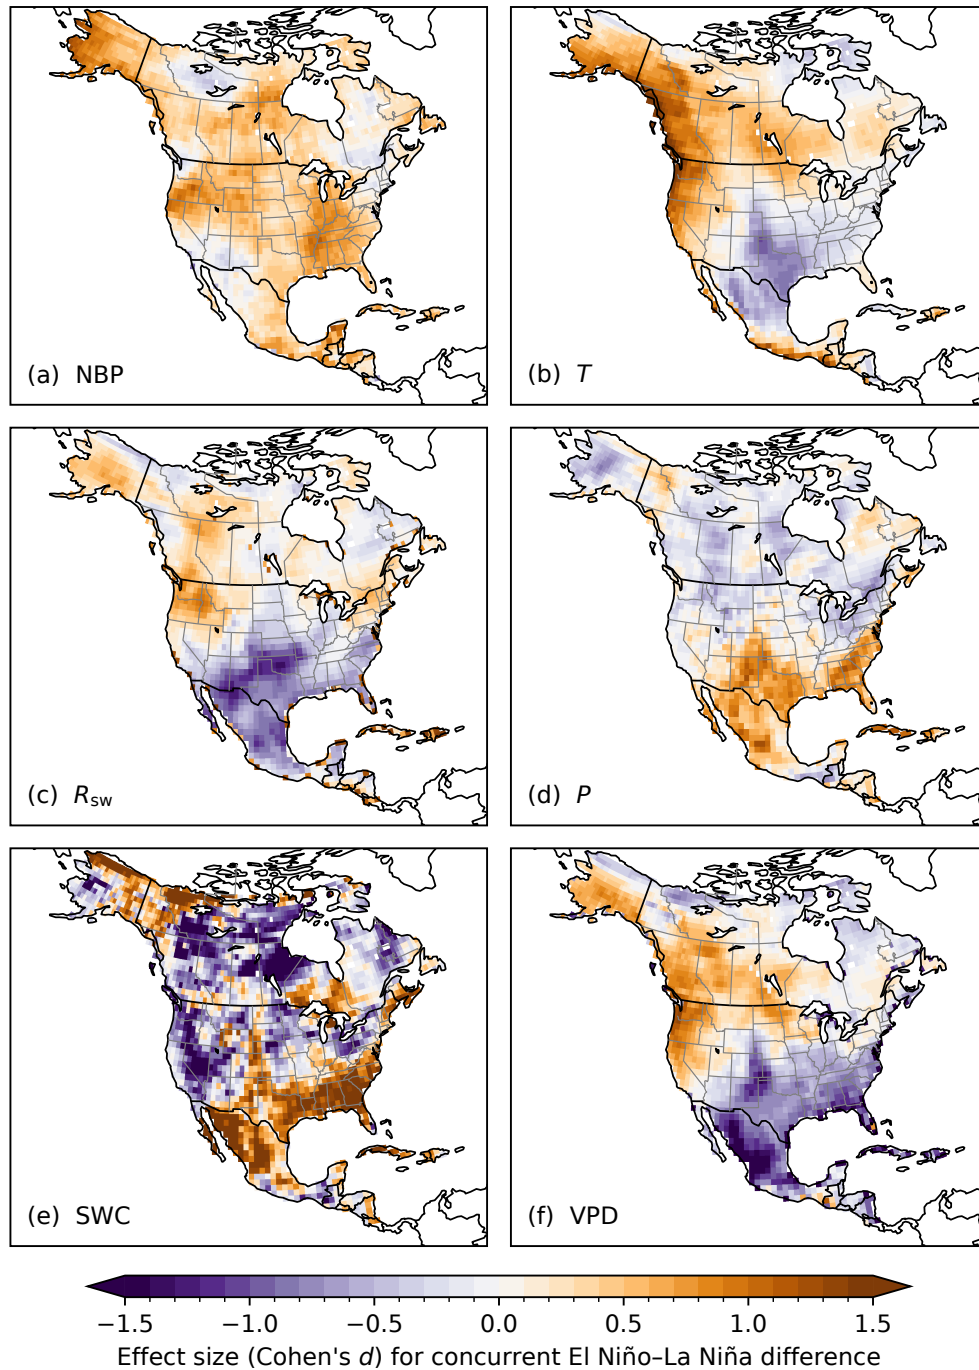

261

262 **Fig. S22.** Effect sizes (Cohen's  $d$ ) for concurrent differences in carbon uptake anomalies and  
 263 climate anomalies between ENSO phases: (a) net biome productivity (NBP); (b) air temperature  
 264 ( $T$ ); (c) incoming shortwave radiation ( $R_{sw}$ ); (d) precipitation ( $P$ ); (e) soil water content (SWC); (f)  
 265 vapor pressure deficit (VPD). Similar to Fig. 5 in the main text, but *without* time lags considered.

Supplement

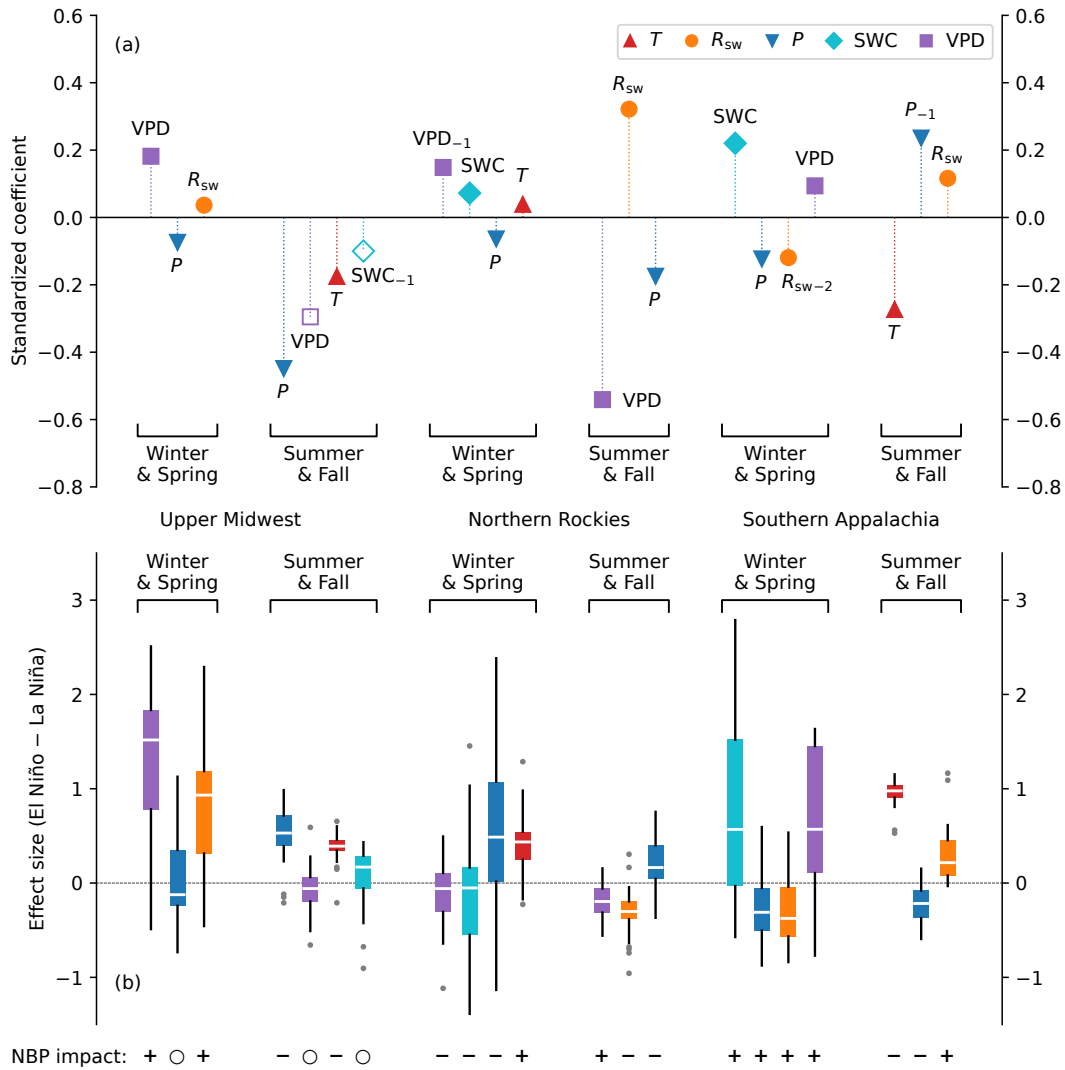

267

268 **Fig. S23.** Attribution of carbon uptake anomalies to climate anomalies by early (winter and  
 269 spring, or December–May) and late seasons (summer and fall, or June–November) for selected  
 270 ENSO-sensitive regions. (a) Standardized coefficients for climate anomalies in explaining carbon  
 271 uptake (i.e., NBP) anomalies in each ENSO-sensitive region in a specific seasonal period, similar  
 272 to Fig. 4a in the main text but divided by seasons. Empty symbols indicate variables that do not  
 273 exert a robust influence on carbon uptake anomalies, as their coefficients may change sign in  
 274 submodels. (b) Direction and relative magnitude of ENSO influences on climate anomalies in each  
 275 region and seasonal period, shown in effect sizes (Cohen's  $d$ ). Effect sizes at the grid cell level are  
 276 binned as boxplots for visual assessment, with the center bar, bounds of box, whiskers, and dots  
 277 representing the median, first and third quartiles, lowest and highest values falling within  $1.5\times$   
 278 of the interquartile range from the nearest quartiles and outliers beyond that range, respectively. The  
 279 NBP impact of each climate variable is indicated at the bottom: a plus (minus) sign means that  
 280 ENSO-induced anomalies increase (decrease) NBP, whereas a circle indicates a non-significant  
 282 influence (i.e., the effect size is not significantly different from zero based on a  $Z$ -test).

Supplement

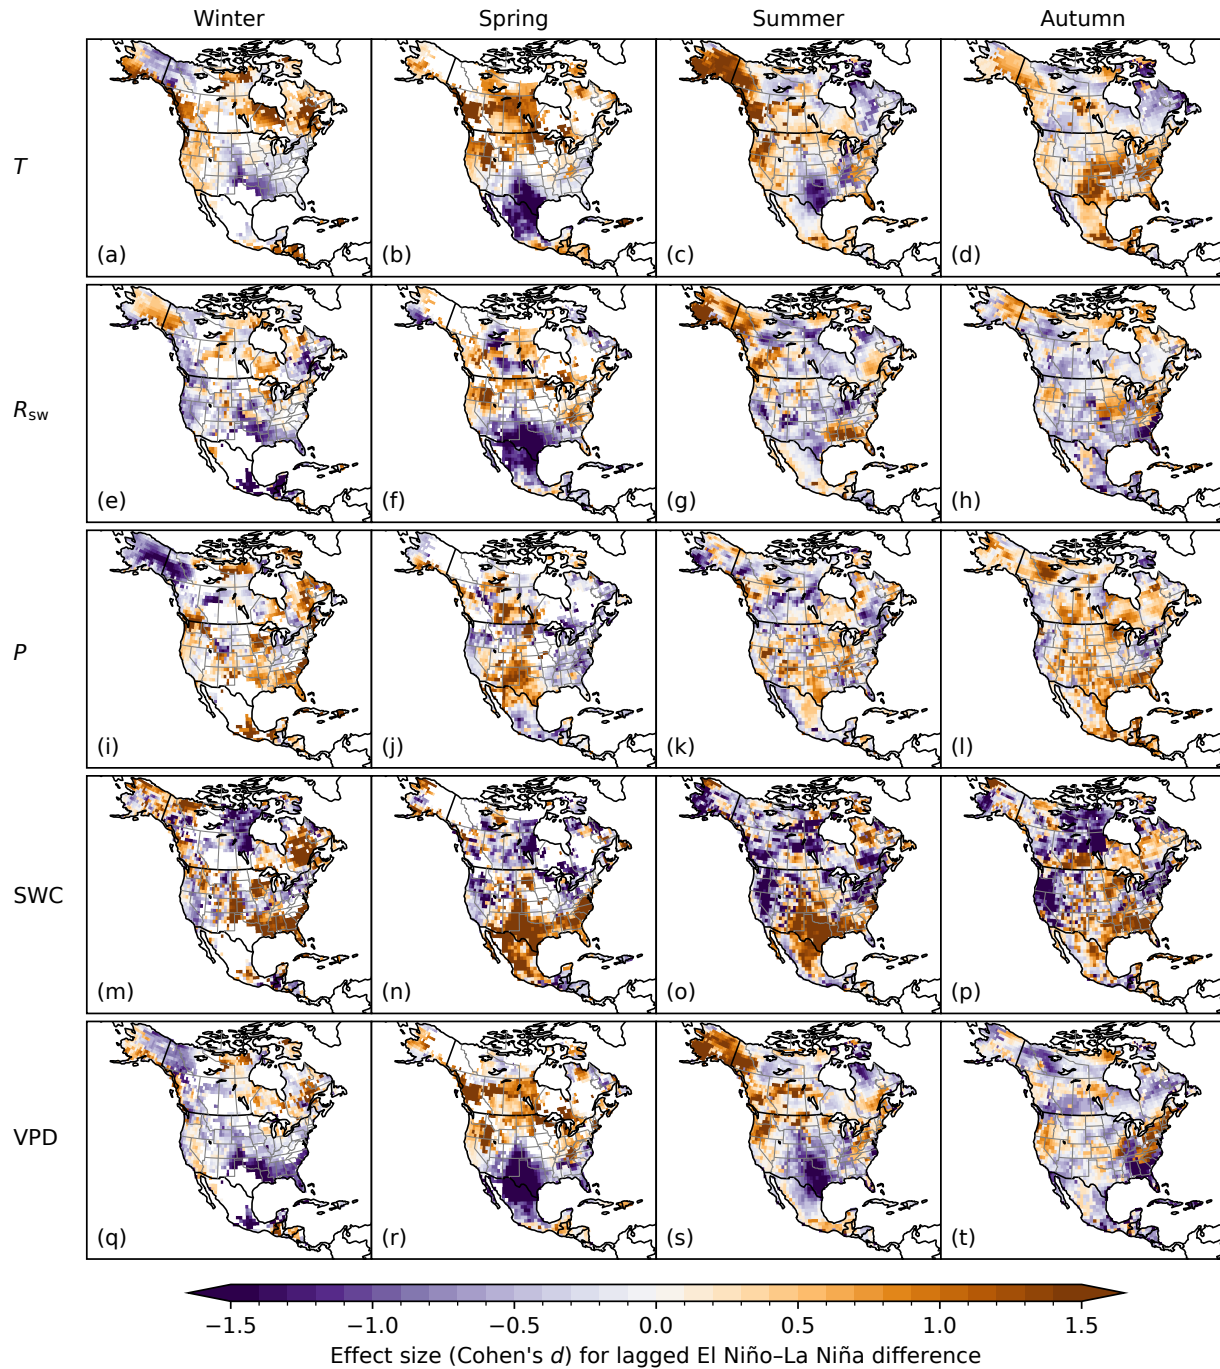

283

284 **Fig. S24.** Effect sizes (Cohen's  $d$ ) for seasonal differences in climate anomalies between ENSO  
 285 phases. Effect sizes are calculated from anomalies in air temperature ( $T$ ), incoming shortwave  
 286 radiation ( $R_{sw}$ ), precipitation ( $P$ ), soil water content (SWC), and vapor pressure deficit (VPD),  
 287 grouped by El Niño- and La Niña-influenced months, with the same time lags for net carbon  
 288 uptake anomalies considered (Fig. 1a in the main text). Rows indicate different climate variables  
 289 and columns different climatological seasons. Blank areas in the North American domain are  
 290 where there are not enough ENSO-influenced months for calculating effect sizes.

Supplement

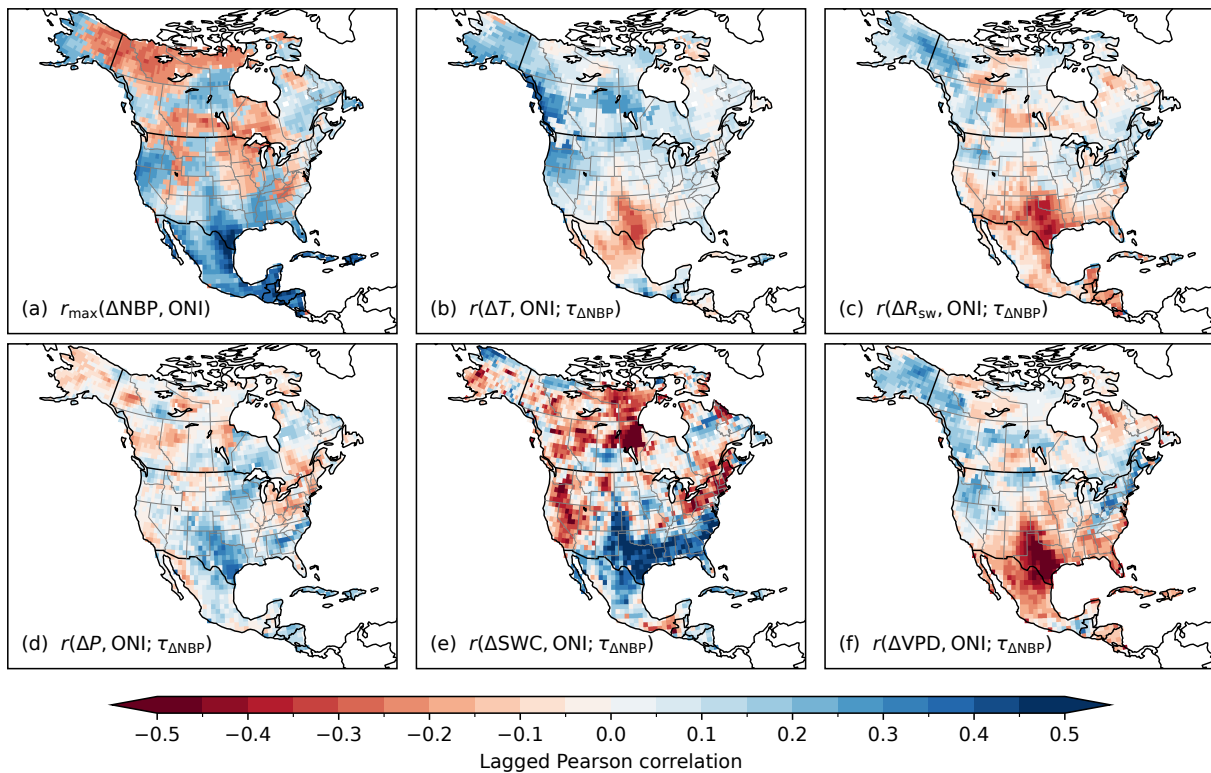

292

293 **Fig. S25.** Lagged Pearson correlations between climate anomalies and the Oceanic Niño Index  
 294 (ONI), with the same time lags for carbon uptake anomalies considered ( $\tau_{\Delta\text{NBP}}$ ). Also shown are  
 295 the optimal Pearson correlation between carbon uptake anomalies and the ONI (a), same as Fig. 1b  
 296 in the main text. Climate anomalies examined are those of temperature (b), shortwave radiation  
 297 (c), precipitation (d), soil moisture (e), and vapor pressure deficit (f). Note that (b–f) differ from  
 298 Fig. S12f–j because the latter is based on time lags associated with each climate variable.

## 300 References

- 301 Delire, C., Séférian, R., Decharme, B., Alkama, R., Calvet, J.-C., Carrer, D., Gibelin, A.-L., Joetzjer, E.,  
 302 Morel, X., Rocher, M., & Tzanos, D. (2020). The global land carbon cycle simulated with  
 303 ISBA-CTRIP: Improvements over the last decade. *Journal of Advances in Modeling Earth*  
 304 *Systems*, 12(9), e2019MS001886. <https://doi.org/10.1029/2019MS001886>
- 305 Friedlingstein, P., O'Sullivan, M., Jones, M. W., Andrew, R. M., Gregor, L., Hauck, J., Le Quéré, C.,  
 306 Luijckx, I. T., Olsen, A., Peters, G. P., Peters, W., Pongratz, J., Schwingshackl, C., Sitch, S.,  
 307 Canadell, J. G., Ciais, P., Jackson, R. B., Alin, S. R., Alkama, R., Arneeth, A., Arora, V. K., Bates,  
 308 N. R., Becker, M., Bellouin, N., Bittig, H. C., Bopp, L., Chevallier, F., Chini, L. P., Cronin, M.,  
 309 Evans, W., Falk, S., Feely, R. A., Gasser, T., Gehlen, M., Gkritzalis, T., Gloege, L., Grassi, G.,  
 310 Gruber, N., Gürses, Ö., Harris, I., Hefner, M., Houghton, R. A., Hurtt, G. C., Iida, Y., Ilyina, T.,  
 311 Jain, A. K., Jersild, A., Kadono, K., Kato, E., Kennedy, D., Klein Goldewijk, K., Knauer, J.,  
 312 Korsbakken, J. I., Landschützer, P., Lefèvre, N., Lindsay, K., Liu, J., Liu, Z., Marland, G.,  
 313 Mayot, N., McGrath, M. J., Metzl, N., Monacchi, N. M., Munro, D. R., Nakaoka, S.-I., Niwa, Y.,  
 314 O'Brien, K., Ono, T., Palmer, P. I., Pan, N., Pierrot, D., Pockock, K., Poulter, B., Resplandy, L.,  
 315 Robertson, E., Rödenbeck, C., Rodriguez, C., Rosan, T. M., Schwinger, J., Séférian, R., Shutler,  
 316 J. D., Skjelvan, I., Steinhoff, T., Sun, Q., Sutton, A. J., Sweeney, C., Takao, S., Tanhua, T., Tans,  
 317 P. P., Tian, X., Tian, H., Tilbrook, B., Tsujino, H., Tubiello, F., van der Werf, G. R., Walker,  
 318 A. P., Wanninkhof, R., Whitehead, C., ... Zheng, B. (2022). Global Carbon Budget 2022.  
 319 *Earth System Science Data*, 14(11), 4811–4900. <https://doi.org/10.5194/essd-14-4811-2022>
- 320 Haverd, V., Smith, B., Nieradzick, L., Briggs, P. R., Woodgate, W., Trudinger, C. M., Canadell, J. G.,  
 321 & Cuntz, M. (2018). A new version of the CABLE land surface model (Subversion revision  
 322 r4601) incorporating land use and land cover change, woody vegetation demography, and  
 323 a novel optimisation-based approach to plant coordination of photosynthesis. *Geoscientific*  
 324 *Model Development*, 11(7), 2995–3026. <https://doi.org/10.5194/gmd-11-2995-2018>
- 325 Hu, L., Andrews, A. E., Thoning, K. W., Sweeney, C., Miller, J. B., Michalak, A. M., Dlugokencky, E.,  
 326 Tans, P. P., Shiga, Y. P., Mountain, M., Nehrkorn, T., Montzka, S. A., McKain, K., Kofler, J.,  
 327 Trudeau, M., Michel, S. E., Biraud, S. C., Fischer, M. L., Worthy, D. E. J., Vaughn, B. H.,  
 328 White, J. W. C., Yadav, V., Basu, S., & van der Velde, I. R. (2019). Enhanced North American  
 329 carbon uptake associated with El Niño. *Science Advances*, 5(6), eaaw0076. <https://doi.org/10.1126/sciadv.aaw0076>
- 330
- 331 Ito, A. (2019). Disequilibrium of terrestrial ecosystem CO<sub>2</sub> budget caused by disturbance-induced  
 332 emissions and non-CO<sub>2</sub> carbon export flows: A global model assessment. *Earth System*  
 333 *Dynamics*, 10(4), 685–709. <https://doi.org/10.5194/esd-10-685-2019>

## Supplement

- 334 Kato, E., Kinoshita, T., Ito, A., Kawamiya, M., & Yamagata, Y. (2013). Evaluation of spatially  
335 explicit emission scenario of land-use change and biomass burning using a process-based  
336 biogeochemical model. *Journal of Land Use Science*, 8(1), 104–122. [https://doi.org/10.1080/  
337 1747423X.2011.628705](https://doi.org/10.1080/1747423X.2011.628705)
- 338 Lawrence, D. M., Fisher, R. A., Koven, C. D., Oleson, K. W., Swenson, S. C., Bonan, G., Collier, N.,  
339 Ghimire, B., van Kampenhout, L., Kennedy, D., Kluzek, E., Lawrence, P. J., Li, F., Li, H.,  
340 Lombardozzi, D., Riley, W. J., Sacks, W. J., Shi, M., Vertenstein, M., Wieder, W. R., Xu,  
341 C., Ali, A. A., Badger, A. M., Bisht, G., van den Broeke, M., Brunke, M. A., Burns, S. P.,  
342 Buzan, J., Clark, M., Craig, A., Dahlin, K., Drewniak, B., Fisher, J. B., Flanner, M., Fox, A. M.,  
343 Gentine, P., Hoffman, F., Keppel-Aleks, G., Knox, R., Kumar, S., Lenaerts, J., Leung, L. R.,  
344 Lipscomb, W. H., Lu, Y., Pandey, A., Pelletier, J. D., Perket, J., Randerson, J. T., Ricciuto,  
345 D. M., Sanderson, B. M., Slater, A., Subin, Z. M., Tang, J., Thomas, R. Q., Val Martin, M.,  
346 & Zeng, X. (2019). The Community Land Model Version 5: Description of new features,  
347 benchmarking, and impact of forcing uncertainty. *Journal of Advances in Modeling Earth  
348 Systems*, 11(12), 4245–4287. <https://doi.org/10.1029/2018MS001583>
- 349 Lienert, S., & Joos, F. (2018). A Bayesian ensemble data assimilation to constrain model parameters  
350 and land-use carbon emissions. *Biogeosciences*, 15(9), 2909–2930. [https://doi.org/10.5194/bg-  
351 15-2909-2018](https://doi.org/10.5194/bg-15-2909-2018)
- 352 Meiyappan, P., Jain, A. K., & House, J. I. (2015). Increased influence of nitrogen limitation on CO<sub>2</sub>  
353 emissions from future land use and land use change. *Global Biogeochemical Cycles*, 29(9),  
354 1524–1548. <https://doi.org/10.1002/2015GB005086>
- 355 Melton, J. R., Arora, V. K., Wisernig-Cojoc, E., Seiler, C., Fortier, M., Chan, E., & Teckentrup, L.  
356 (2020). CLASSIC v1.0: The open-source community successor to the Canadian Land Surface  
357 Scheme (CLASS) and the Canadian Terrestrial Ecosystem Model (CTEM) – part 1: Model  
358 framework and site-level performance. *Geoscientific Model Development*, 13(6), 2825–2850.  
359 <https://doi.org/10.5194/gmd-13-2825-2020>
- 360 Poulter, B., Frank, D. C., Hodson, E. L., & Zimmermann, N. E. (2011). Impacts of land cover and  
361 climate data selection on understanding terrestrial carbon dynamics and the CO<sub>2</sub> airborne  
362 fraction. *Biogeosciences*, 8(8), 2027–2036. <https://doi.org/10.5194/bg-8-2027-2011>
- 363 Reick, C. H., Gayler, V., Goll, D., Hagemann, S., Heidkamp, M., Nabel, J. E. M. S., Raddatz, T., Roeck-  
364 ner, E., Schnur, R., & Wilkenskjeld, S. (2021). *J5BACH 3 - the land component of the MPI Earth  
365 System Model: Documentation of version 3.2* (Berichte zur Erdsystemforschung (Reports on  
366 Earth System Science) No. 240). Max-Planck-Institut für Meteorologie. Hamburg, Germany.  
367 <https://doi.org/10.17617/2.3279802>
- 368 Sitch, S., O'Sullivan, M., Robertson, E., Friedlingstein, P., Albergel, C., Anthoni, P., Arneth, A.,  
369 Arora, V. K., Bastos, A., Bastrikov, V., Bellouin, N., Canadell, J. G., Chini, L., Ciais, P., Falk,

## Supplement

- 370 S., Harris, I., Hurtt, G., Ito, A., Jain, A. K., Jones, M. W., Joos, F., Kato, E., Kennedy, D.,  
371 Klein Goldewijk, K., Kluzek, E., Knauer, J., Lawrence, P. J., Lombardozzi, D., Melton, J. R.,  
372 Nabel, J. E. M. S., Pan, N., Peylin, P., Pongratz, J., Poulter, B., Rosan, T. M., Sun, Q., Tian,  
373 H., Walker, A. P., Weber, U., Yuan, W., Yue, X., & Zaehle, S. (2024). Trends and drivers  
374 of terrestrial sources and sinks of carbon dioxide: An overview of the TRENDY project.  
375 *Global Biogeochemical Cycles*, 38(7), e2024GB008102. <https://doi.org/10.1029/2024GB008102>
- 376 van der Werf, G. R., Randerson, J. T., Giglio, L., van Leeuwen, T. T., Chen, Y., Rogers, B. M., Mu, M.,  
377 van Marle, M. J. E., Morton, D. C., Collatz, G. J., Yokelson, R. J., & Kasibhatla, P. S. (2017).  
378 Global fire emissions estimates during 1997–2016. *Earth System Science Data*, 9(2), 697–720.  
379 <https://doi.org/10.5194/essd-9-697-2017>
- 380 Vuichard, N., Messina, P., Luysaert, S., Guenet, B., Zaehle, S., Ghattas, J., Bastrikov, V., & Peylin, P.  
381 (2019). Accounting for carbon and nitrogen interactions in the global terrestrial ecosystem  
382 model ORCHIDEE (trunk version, rev 4999): Multi-scale evaluation of gross primary  
383 production. *Geoscientific Model Development*, 12(11), 4751–4779. [https://doi.org/10.5194/](https://doi.org/10.5194/gmd-12-4751-2019)  
384 [gmd-12-4751-2019](https://doi.org/10.5194/gmd-12-4751-2019)
- 385 Walker, A. P., Quaipe, T., van Bodegom, P. M., De Kauwe, M. G., Keenan, T. F., Joiner, J., Lomas,  
386 M. R., MacBean, N., Xu, C., Yang, X., & Woodward, F. I. (2017). The impact of alternative  
387 trait-scaling hypotheses for the maximum photosynthetic carboxylation rate ( $V_{\text{cmax}}$ ) on  
388 global gross primary production. *New Phytologist*, 215(4), 1370–1386. [https://doi.org/10.](https://doi.org/10.1111/nph.14623)  
389 [1111/nph.14623](https://doi.org/10.1111/nph.14623)
- 390 Wiltshire, A. J., Burke, E. J., Chadburn, S. E., Jones, C. D., Cox, P. M., Davies-Barnard, T., Friedling-  
391 stein, P., Harper, A. B., Liddicoat, S., Sitch, S., & Zaehle, S. (2021). JULES-CN: A coupled  
392 terrestrial carbon–nitrogen scheme (JULES vn5.1). *Geoscientific Model Development*, 14(4),  
393 2161–2186. <https://doi.org/10.5194/gmd-14-2161-2021>
- 394 Yuan, W., Liu, D., Dong, W., Liu, S., Zhou, G., Yu, G., Zhao, T., Feng, J., Ma, Z., Chen, J., Chen,  
395 Y., Chen, S., Han, S., Huang, J., Li, L., Liu, H., Liu, S., Ma, M., Wang, Y., Xia, J., Xu, W.,  
396 Zhang, Q., Zhao, X., & Zhao, L. (2014). Multiyear precipitation reduction strongly decreases  
397 carbon uptake over northern China. *Journal of Geophysical Research: Biogeosciences*, 119(5),  
398 881–896. <https://doi.org/10.1002/2014JG002608>
- 399 Yue, X., & Unger, N. (2015). The Yale Interactive terrestrial Biosphere model version 1.0: Description,  
400 evaluation and implementation into NASA GISS ModelE2. *Geoscientific Model Development*,  
401 8(8), 2399–2417. <https://doi.org/10.5194/gmd-8-2399-2015>
- 402 Zaehle, S., & Friend, A. D. (2010). Carbon and nitrogen cycle dynamics in the O-CN land surface  
403 model: 1. model description, site-scale evaluation, and sensitivity to parameter estimates.  
404 *Global Biogeochemical Cycles*, 24(1), GB1005. <https://doi.org/10.1029/2009GB003521>
